# Supplementary material for: Biomarkers of ambient air pollution and lung cancer: a systematic review
Source: HighWire-hosted journal article supplement (doi:10.1136/oemed-2011-100566), 2012-07-07
Supplement: oemed-2011-100566-s1.pdf [file oemed-2011-100566-s1.pdf]

## **SUPPLEMENTARY MATERIAL**

**Title: Biomarkers of ambient air pollution and lung cancer: strength of evidence** Christiana Demetriou<sup>1,6</sup>, Ole Raaschou-Nielsen<sup>2</sup>, Steffen Loft<sup>3</sup>, Peter Møller<sup>3</sup>, Roel Vermeulen<sup>4</sup>, Domenico Palli<sup>5</sup>, Marc Chadeau-Hyam<sup>1</sup>, Wei W Xun<sup>1</sup>, Paolo Vineis<sup>1</sup>

### **Table of Contents**

#### **Title of Item**

#### **Page**

- Supplemental Material Table 1 – Prospective study results on the relationship between exposure to air pollution and lung cancer incidence and/or mortality, listed by study or cohort 2
- Supplemental Material Table 2 – Results on the association between air pollution and 1-OHP in the urine of exposed individuals: linear regression, logistic regression, and correlation analyses 7
- Supplemental Material Table 3 – Results on the association between air pollution and 1-OHP in the urine of exposed individuals: comparison of means analysis 8
- Supplemental Material Table 4 – Results on the association between air pollution and DNA adducts in exposed individuals; linear regression, logistic regression and correlation analyses 9
- Supplemental Material Table 5 – Results on the association between air pollution and DNA adducts in exposed individuals; comparison of means analysis 10
- Supplemental Material Table 6 - Results on the association between air pollution and oxidatively damaged nucleobases/deoxynucleosides in urine or mononuclear blood cells; comparison of means analysis 11
- Supplemental Material Table 6a - Confounding in studies of DNA adducts 13
- Supplemental Material Table 7 - Results on the association between air pollution and oxidatively damaged nucleobases/deoxynucleosides in urine or mononuclear blood cells; linear regression and correlation analysis 14
- Supplemental Material Table 7a – Confounding factors controlled for in studies investigating oxidative damage to nucleobases 15
- Supplemental Material Table 8 – Results on the association between air pollution and CAs in the cells of exposed individuals; logistic regression and comparison of means analyses 16
- Supplemental Material Table 9 – Results on the association between air pollution and MN in peripheral blood cells of exposed individuals: linear regression analyses 18
- Supplemental Material Table 10 - Results on the association between air pollution and methylation changes in the cells of exposed individuals 19
- Supplemental Material Figure 1 - Flow Chart of Literature Review 21
- Supplemental Material Figure 2 - Putative Mechanisms of cancer through oxidative damage from air pollution 22
- Supplemental Material Figure 3 - Funnel plot of the standard error of the standardized mean difference (SMD) vs the SMD of studies on DNA adducts (in a fixed effects model to get the pseudo CI lines). 23
- Supplemental Material Figure 4 - Funnel plot of the standard error of the standardized mean difference (SMD) vs the SMD of all the studies on oxidative DNA damage shown in Table 6- Supplemental Material (in a fixed effects model to get the pseudo CI lines). 24
- Supplemental Material References 25

**Table 1 – Prospective study results on the relationship between exposure to air pollution and lung cancer incidence and/or mortality, listed by study or cohort**

| First Author, Year           | Area/Country    | Exposure‡                                                      | Outcome                          | Controlled Confounders                                                           | Number of Subjects | RR†  | CI†           |               |            |
|------------------------------|-----------------|----------------------------------------------------------------|----------------------------------|----------------------------------------------------------------------------------|--------------------|------|---------------|---------------|------------|
| <b>AMERICAN STUDIES</b>      |                 |                                                                |                                  |                                                                                  |                    |      |               |               |            |
| <b>American Legion Study</b> |                 |                                                                |                                  |                                                                                  |                    |      |               |               |            |
| <b>Buell, 1967</b>           | USA             | >10 yrs in LA county vs. other counties                        | Lung Cancer Mortality            | Age, sex, smoking, size of birthplace                                            | 336,571 person-yrs | 2.5  | *not reported |               |            |
|                              |                 | >10yrs vs. <10yrs in LA county                                 | Lung Cancer Mortality            | Age, sex, smoking, size of birthplace                                            |                    |      | 1.26          | *not reported |            |
| <b>ASHMOG Study</b>          |                 |                                                                |                                  |                                                                                  |                    |      |               |               |            |
| <b>Mills, 1991</b>           | USA             | Total Suspended Particulate (exceedance frequency of 200µg/m3) | Cancer in females incidence      | Age, sex, education, ex-smoking, ETS†, and occupational exposure                 | 6,000              | 1.72 | 0.81-3.65     |               |            |
|                              |                 | Ozone (exceedance frequency of 10pphm)                         | Lung Cancer incidence            | Age, sex, education, ex-smoking, ETS, and occupational exposure                  |                    |      |               | 2.25          | 0.96-5.31  |
| <b>Beeson, 1998</b>          | California, USA | Ozone (100ppb increase)                                        | Lung Cancer incidence - males    | Pack-years of past cigarette smoking, educational level, and current alcohol use | 6,338              | 3.56 | 1.35-9.42     |               |            |
|                              |                 | PM10† (IQR increase)                                           | Lung Cancer Incidence - males    | Pack-years of past cigarette smoking, educational level, and current alcohol use |                    |      |               | 5.21          | 1.96-13.99 |
|                              |                 | SO <sub>2</sub> (IQR increases)                                | Lung Cancer Incidence - males    | Pack-years of past cigarette smoking, educational level, and current alcohol use |                    |      |               | 2.66          | 1.62-4.39  |
|                              |                 | PM10 exceedance frequencies of 50 microg/m3 (IQR increase)     | Lung Cancer Incidence - females  | Smoking, Age                                                                     |                    |      |               | 1.21          | 0.55-2.66  |
|                              |                 | PM10 exceedance frequencies of 60 microg/m3 (IQR increase)     | Lung Cancer Incidence - females  | Smoking, Age                                                                     |                    |      |               | 1.25          | 0.57-2.71  |
|                              |                 | SO <sub>2</sub> (IQR increases)                                | Lung Cancer Incidence - females  | Smoking, Age                                                                     |                    |      |               | 2.14          | 1.36-3.37  |
| <b>Abbey, 1999</b>           | USA             | PM10 (IQR increase in mean conc.)                              | Lung Cancer Mortality in males   | Years of education, pack-years of ex smoking, alcohol use                        | 6,338              | 3.36 | 1.57-7.19     |               |            |
|                              |                 | PM10 (IQR increase in mean conc.)                              | Lung Cancer Mortality in females | Years of education and pack-years of past smoking                                |                    |      |               | 1.33          | 0.60-1.96  |

|                                               |     |                                                     |                                  |                                                                                                                                           |                  |      |           |
|-----------------------------------------------|-----|-----------------------------------------------------|----------------------------------|-------------------------------------------------------------------------------------------------------------------------------------------|------------------|------|-----------|
|                                               |     | Ozone (IQR increase in mean conc.)                  | Lung Cancer Mortality in males   | Years of education, pack-years of ex smoking, alcohol use                                                                                 |                  | 2.10 | 0.99-4.44 |
|                                               |     | Ozone (IQR increase in mean conc.)                  | Lung Cancer Mortality in females | Years of education and pack-years of past smoking                                                                                         |                  | 0.77 | 0.37-1.61 |
|                                               |     | SO <sub>2</sub> (IQR increase in mean conc.)        | Lung Cancer Mortality in males   | Years of education, pack-years of ex smoking, alcohol use                                                                                 |                  | 1.99 | 1.24-3.20 |
|                                               |     | SO <sub>2</sub> (IQR increase in mean conc.)        | Lung Cancer Mortality in females | Years of education and pack-years of past smoking                                                                                         |                  | 3.01 | 1.88-4.84 |
|                                               |     | NO <sub>2</sub> (IQR increase in mean conc.)        | Lung Cancer Mortality in males   | Years of education, pack-years of ex smoking, alcohol use                                                                                 |                  | 1.82 | 0.93-3.57 |
|                                               |     | NO <sub>2</sub> (IQR increase in mean conc.)        | Lung Cancer Mortality in females | Years of education and pack-years of past smoking                                                                                         |                  | 2.81 | 1.15-6.89 |
| <b>McDonnell, 2000</b>                        | USA | PM2.5† (IQR increase = 24.3 µg/m <sup>3</sup> ),    | Lung Cancer Mortality            |                                                                                                                                           | 6,338            | 2.23 | 0.56-8.94 |
|                                               |     | PM2.5-10 (IQR increase = 9.7 µg/m <sup>3</sup> )    | Lung Cancer Mortality            |                                                                                                                                           |                  | 1.25 | 0.63-2.49 |
|                                               |     | PM10 (IQR increase = 29.5µg/m <sup>3</sup> )        | Lung Cancer Mortality            |                                                                                                                                           |                  | 1.84 | 0.59-5.67 |
| <b>American Cancer Prevention Study II</b>    |     |                                                     |                                  |                                                                                                                                           |                  |      |           |
| <b>Pope, 2002</b>                             | USA | NO <sub>2</sub> (10 microg/m <sup>3</sup> increase) | Lung Cancer Mortality            | Age, sex, race, smoking, education, marital status, body mass, alcohol consumption, occupation, and diet                                  | 409-493 thousand | 1.14 | 1.04-1.23 |
| <b>Jerrett, 2005</b>                          | USA | PM10 (10 microg/m <sup>3</sup> increase)            | Lung Cancer Mortality            | Age, sex, race, education, smoking, marital status, BMI, alcohol consumption, occupational exposure, diet, and other ecological variables | 22,905           | 1.2  | 0.79-1.82 |
|                                               |     | Ozone (10 microg/m <sup>3</sup> increase)           | Lung Cancer Mortality            | Age, sex, race, education, smoking, marital status, BMI, alcohol consumption, occupational exposure, diet, and other ecological variables |                  | 0.99 | 0.91-1.07 |
| <b>Turner, 2011</b>                           | USA | Distance to freeways (<500m vs. >500m)              | Lung Cancer Mortality            | Age, sex, race, education, smoking, marital status, BMI, alcohol consumption, occupational exposure, diet, and other ecological variables |                  | 1.44 | 0.94-2.21 |
|                                               |     | PM2.5 (10 microg/m <sup>3</sup> increase) ACP       | Lung Cancer Mortality            | Age, sex, smoking, educational attainment, BMI, chronic lung disease                                                                      | 188,699          | NA   | 1.15-1.27 |
| <b>Pope, 2011</b>                             | USA | PM2.5 (10 microg/m <sup>3</sup> increase)           | Lung Cancer Mortality            | Age, sex, education, marital status, body mass, alcohol consumption, occupational exposures, smoking duration, and diet                   | 1.2million       | 1.14 | 1.04-1.23 |
| <b>Harvard Six Cities Study Dockery, 1993</b> | USA | Inhalable particles:                                | Lung Cancer                      | Age, sex, smoking, education, and BMI                                                                                                     |                  | 1.27 | 1.08-1.48 |

|                            |                        |                                                                 |                       |                                                                                                                            |           |      |           |
|----------------------------|------------------------|-----------------------------------------------------------------|-----------------------|----------------------------------------------------------------------------------------------------------------------------|-----------|------|-----------|
|                            |                        | Most polluted vs. Least polluted city                           | mortality             |                                                                                                                            | 8,111     |      |           |
|                            |                        | Fine particles: Most polluted vs. Least polluted city           | Lung Cancer mortality | Age, sex, smoking, education, and BMI                                                                                      |           | 1.26 | 1.08-1.47 |
|                            |                        | Sulphate particles: Most polluted vs. Least polluted city       | Lung Cancer mortality | Age, sex, smoking, education, and BMI                                                                                      |           | 1.26 | 1.08-1.47 |
| <b>Krewski, 2005</b>       | USA                    | PM2.5 (most vs. least polluted city = 18.6 microg/m3 increase)  | Lung Cancer Mortality | Age, sex, smoking, education, BMI, diabetes, occupational exposure to dust, gases or fumes                                 | 8,111     | 1.43 | 0.85-2.41 |
| <b>Laden, 2006</b>         | USA                    | PM2.5                                                           | Lung Cancer mortality | Age, sex, smoking, education, and BMI                                                                                      | 8,096     | 1.27 | 0.96-1.69 |
| <b>EUROPEAN STUDIES</b>    |                        |                                                                 |                       |                                                                                                                            |           |      |           |
| <b>Cohort of Oslo men</b>  |                        |                                                                 |                       |                                                                                                                            |           |      |           |
| <b>Nafstad, 2003</b>       | Norway                 | NO(x) (per 10 µg/m3 - home address)                             | Lung Cancer incidence | Age, smoking habits, and length of education                                                                               | 16,209    | 1.08 | 1.02-1.15 |
|                            |                        | SO <sub>2</sub> (per 10 µg/m3)                                  | Lung Cancer incidence | Age, smoking habits, and length of education                                                                               |           | 1.01 | 0.94-1.08 |
| <b>French PAARC Study</b>  |                        |                                                                 |                       |                                                                                                                            |           |      |           |
| <b>Filleul, 2005</b>       | France                 | Total Suspended Particulate (exceedance frequency of 200 µg/m3) | Lung Cancer Mortality | Age, sex, BMI, smoking, occupational exposure, education                                                                   | 14,284    | 0.97 | 0.94-1.01 |
|                            |                        | Black Smoke (for 10 µg/m <sup>3</sup> )                         | Lung Cancer Mortality | Age, sex, BMI, smoking, occupational exposure, education                                                                   |           | 0.97 | 0.93-1.01 |
|                            |                        | NO (for 10 µg/m <sup>3</sup> )                                  | Lung Cancer Mortality | Age, sex, BMI, smoking, occupational exposure, education                                                                   |           | 0.97 | 0.94-1.01 |
|                            |                        | NO <sub>2</sub> (for 10 µg/m <sup>3</sup> )                     | Lung Cancer Mortality | Age, sex, BMI, smoking, occupational exposure, education                                                                   |           | 0.97 | 0.85-1.10 |
|                            |                        | SO <sub>2</sub> (for 10 µg/m <sup>3</sup> )                     | Lung Cancer Mortality | Age, sex, BMI, smoking, occupational exposure, education                                                                   |           | 0.99 | 0.92-1.07 |
| <b>GENAIR Cohort Study</b> |                        |                                                                 |                       |                                                                                                                            |           |      |           |
| <b>Vineis, 2006</b>        | Ten European Countries | PM10 (10 microg/m3 increase)                                    | Lung Cancer Incidence | Age, BMI, education, gender, smoking, alcohol use, intake of meat, intake of fruit and vegetables, time since recruitment, | 197 cases | 0.91 | 0.70-1.18 |

|                                                    |             |                                                                                      |                          |                                                                                                                                                                                                                          |                            |      |           |
|----------------------------------------------------|-------------|--------------------------------------------------------------------------------------|--------------------------|--------------------------------------------------------------------------------------------------------------------------------------------------------------------------------------------------------------------------|----------------------------|------|-----------|
|                                                    |             |                                                                                      |                          | country, occupational index and cotinine<br>Age, BMI, education, gender, smoking,<br>alcohol use, intake of meat, intake of fruit<br>and vegetables, time since recruitment,<br>country, occupational index and cotinine | 556 controls               |      |           |
|                                                    |             | NO <sub>2</sub> (10 microg/m <sup>3</sup><br>increase)                               | Lung Cancer<br>Incidence | Age, BMI, education, gender, smoking,<br>alcohol use, intake of meat, intake of fruit<br>and vegetables, time since recruitment,<br>country, occupational index and cotinine                                             |                            | 1.14 | 0.78-1.67 |
|                                                    |             | SO <sub>2</sub> (10 microg/m <sup>3</sup><br>increase)                               | Lung Cancer<br>Incidence | Age, BMI, education, gender, smoking,<br>alcohol use, intake of meat, intake of fruit<br>and vegetables, time since recruitment,<br>country, occupational index and cotinine                                             |                            | 1.08 | 0.89-1.30 |
|                                                    |             | Proximity of residence<br>to major road (exposed<br>vs. nonexposed)                  | Lung Cancer<br>Incidence | Age, BMI, education, gender, smoking,<br>alcohol use, intake of meat, intake of fruit<br>and vegetables, time since recruitment,<br>country, occupational index and cotinine                                             |                            | 1.31 | 0.82-2.09 |
| <b>Netherlands Cohort Study on Diet and Cancer</b> |             |                                                                                      |                          |                                                                                                                                                                                                                          |                            |      |           |
| <b>Beelen, 2008</b>                                | Netherlands | Black smoke<br>concentration                                                         | Lung Cancer<br>incidence | Age, sex, smoking status, area-level<br>socioeconomic status                                                                                                                                                             | 40,114                     | 1.47 | 1.01-2.16 |
|                                                    |             | Traffic intensity on<br>nearest road                                                 | Lung Cancer<br>incidence | Age, sex, smoking status, area-level<br>socioeconomic status                                                                                                                                                             |                            | 1.11 | 0.88-1.41 |
|                                                    |             | Living near a major<br>road                                                          | Lung Cancer<br>incidence | Age, sex, smoking status, area-level<br>socioeconomic status                                                                                                                                                             |                            | 1.55 | 0.98-2.43 |
| <b>Brunekreef, 2009</b>                            | Netherlands | Black smoke (per 10<br>µg/m <sup>3</sup> )                                           | Lung Cancer<br>Mortality | Age, sex, smoking status, area-level<br>socioeconomic status                                                                                                                                                             | 120,000                    | 1.03 | 0.88-1.20 |
|                                                    |             | Traffic intensity<br>(increase of 10,000<br>motor vehicles/day)                      | Lung Cancer<br>Mortality | Age, sex, smoking status, area-level<br>socioeconomic status                                                                                                                                                             |                            | 1.07 | 0.96-1.19 |
|                                                    |             | Black smoke (per 10<br>µg/m <sup>3</sup> )                                           | Lung Cancer<br>Incidence | Age, sex, smoking status, area-level<br>socioeconomic status                                                                                                                                                             |                            | 1.47 | 1.01-2.16 |
| <b>Diet, Cancer and Health cohort study</b>        |             |                                                                                      |                          |                                                                                                                                                                                                                          |                            |      |           |
| <b>Raaschou-Nielsen, 2011</b>                      | Denmark     | NO <sub>x</sub> at residence (per<br>100 µg/m <sup>3</sup> increase)                 | Lung Cancer<br>Incidence | Age, smoking, ETS, length of school<br>attendance, fruit intake, and employment                                                                                                                                          | 52,970                     | 1.09 | 0.79-1.51 |
|                                                    |             | Traffic load at residence<br>(per 10 <sup>4</sup> vehicle<br>km/day)                 | Lung Cancer<br>Incidence | Age, smoking, ETS, length of school<br>attendance, fruit intake, and employment                                                                                                                                          | 52,970                     | 1.03 | 0.90-1.19 |
| <b>Three Prospective Cohorts</b>                   |             |                                                                                      |                          |                                                                                                                                                                                                                          |                            |      |           |
| <b>Raaschou-Nielsen, 2010</b>                      | Denmark     | NO <sub>x</sub> <sup>†</sup> (30-72 µg/m <sup>3</sup> vs.<br><30 µg/m <sup>3</sup> ) | Lung Cancer<br>Incidence | Smoking (status, duration, and intensity),<br>educational level, body mass index, and<br>alcohol consumption.                                                                                                            | 679 cases<br>3481 controls | 1.30 | 1.07-1.57 |
|                                                    |             | NO <sub>x</sub> (>72 µg/m <sup>3</sup> vs.<br><30 µg/m <sup>3</sup> )                | Lung Cancer<br>Incidence | Smoking (status, duration, and intensity),<br>educational level, body mass index, and<br>alcohol consumption.                                                                                                            |                            | 1.45 | 1.12-1.88 |

**OTHER STUDIES**

|                       |             |                                                       |                                     |                                                                                                                                                                                                                                        |              |       |             |
|-----------------------|-------------|-------------------------------------------------------|-------------------------------------|----------------------------------------------------------------------------------------------------------------------------------------------------------------------------------------------------------------------------------------|--------------|-------|-------------|
| <b>Pope, 1995</b>     | USA         | Most vs. Least polluted:<br>Sulphates                 | Lung Cancer mortality               | Smoking                                                                                                                                                                                                                                | 552,138      | 1.15  | 1.09-1.22   |
|                       |             | Most vs. Least polluted:<br>Fine particles            | Lung Cancer mortality               | Smoking                                                                                                                                                                                                                                |              | 1.17  | 1.09-1.26   |
| <b>Yorifuji, 2010</b> | Japan       | NO <sub>2</sub> (10 microg/m <sup>3</sup> increase)   | Lung Cancer mortality - non smokers | Smoking<br>Sex, age, smoking status, pack-years, smoking status of family members living together, daily green and yellow vegetable consumption, daily fruit consumption, and use of indoor charcoal or briquette braziers for heating | 14,001       | 1.3   | 0.85-1.93   |
| <b>Katanoda, 2011</b> | Japan       | PM <sub>2.5</sub> (10 microg/m <sup>3</sup> increase) | Lung Cancer mortality               | Sex, age, smoking status, pack-years, smoking status of family members living together, daily green and yellow vegetable consumption, daily fruit consumption, and use of indoor charcoal or briquette braziers for heating            | 63,520       | 1.24  | 1.12-1.37   |
|                       |             | NO <sub>2</sub> (10 microg/m <sup>3</sup> increase)   | Lung Cancer mortality               | Sex, age, smoking status, pack-years, smoking status of family members living together, daily green and yellow vegetable consumption, daily fruit consumption, and use of indoor charcoal or briquette braziers for heating            | 63,520       | 1.26  | 1.07-1.48   |
| <b>Hales, 2011</b>    | New Zealand | SO <sub>2</sub> (10 microg/m <sup>3</sup> increase)   | Lung Cancer mortality               | Sex, age, smoking status, pack-years, smoking status of family members living together, daily green and yellow vegetable consumption, daily fruit consumption, and use of indoor charcoal or briquette braziers for heating            | 63,520       | 1.17  | 1.10-1.26   |
|                       |             | PM <sub>10</sub> (1microg/m <sup>3</sup> increase)    | Lung Cancer mortality               | Age, sex, ethnicity                                                                                                                                                                                                                    | 1<br>050 222 | 1.015 | 0.004-1.026 |

**Table 2 – Results on the association between air pollution and 1-OHP in the urine of exposed individuals: linear regression, logistic regression, and correlation analyses.**

| First author, Year           | Area/ Country       | Exposure                                                                    | Controlled Confounders                                                                     | Effect Measure $\neq$                                          | Sample Size (Total: 541) | Subject description                                                             | P      |
|------------------------------|---------------------|-----------------------------------------------------------------------------|--------------------------------------------------------------------------------------------|----------------------------------------------------------------|--------------------------|---------------------------------------------------------------------------------|--------|
| <b>Castaño-Vinyals, 2004</b> | Review              | B[a]P                                                                       | Not applicable                                                                             | r: 0.76                                                        | 17                       | Pairs of data - log transformed means - from different studies                  | 0.038  |
| <b>Hansen, 2004</b>          | Copenhagen, Denmark | B[a]P $\dagger$<br>Environmental pollution                                  | Job, gender, NAT2 phenotype, age, vehicle exhaust, cooked food mutagens, physical exercise | r: 0.83                                                        |                          | personal sampling of B(a)P: mean values                                         | 0.04   |
|                              |                     |                                                                             |                                                                                            | OR $\dagger$ : 1.51 (male) / 1.38 (female)                     | 60<br>88                 | bus drivers<br>mail carriers                                                    | 0.08   |
| <b>Hansen, 2005</b>          | Denmark             | Residence in urban vs. rural areas<br>One additional hour spent outside/day | Gender, time spent outside<br>Gender, residence                                            | OR: 1.29                                                       | 102                      | children in Copenhagen                                                          | 0.03   |
|                              |                     |                                                                             |                                                                                            | OR: 1.58                                                       | 100                      | children from rural residences                                                  |        |
| <b>Freire, 2009</b>          | Granada, Spain      | NO2 (predicted)                                                             | Exposure to ETS $\dagger$ and cooking appliance                                            | $\beta$ : 0.401                                                | 102                      | children in Copenhagen                                                          | <0.001 |
|                              |                     |                                                                             |                                                                                            |                                                                | 100                      | children from rural residences                                                  |        |
| <b>Hu, 2011</b>              | Taiwan              | Residence near a coal fired power plant (PAH in air)                        | Age, gender, ETS, dietary exposure, and traffic                                            | OR: 1.85<br>95%CI(1.43, 2.40)<br>OR: 1.65<br>95%CI(1.30, 2.09) | 93                       | children with predicted exposure to NO <sub>2</sub> ≥22.50 μg,m <sup>-3</sup> / | 0.006  |
|                              |                     |                                                                             |                                                                                            |                                                                | 81                       | children with predicted exposure to NO <sub>2</sub> <22.50 μg,m <sup>-3</sup>   |        |
|                              |                     |                                                                             |                                                                                            |                                                                | 146                      | Children in high exposure community 1 vs, Low exposure community 1              |        |
|                              |                     |                                                                             |                                                                                            |                                                                | 88                       | Children in high exposure community 2 vs, Low exposure community 1              | NA     |

$\neq$  r = correlation coefficient;  $\beta$  = linear regression coefficient (change in 1-OHP levels (7icromole/mol) for every unit change in exposure); OR = logistic regression odds ratio

$\dagger$  B[a]P Benzo [a] Pyrene; OR odds ratio; ETS environmental tobacco smoke.

**Table 3 – Results on the association between air pollution and 1-OHP in the urine of exposed individuals: comparison of means analysis.**

| First author, Year            | Area/<br>Country               | Exposure                                             | Controlled<br>Confounders                                                                                                                                          | Groups<br>Sample Size (Total: 742)                                                                                                                                                                                                                                  | Mean<br>(micromol/mol) ±<br>SD (unless otherwise<br>stated)                                           | P                 |
|-------------------------------|--------------------------------|------------------------------------------------------|--------------------------------------------------------------------------------------------------------------------------------------------------------------------|---------------------------------------------------------------------------------------------------------------------------------------------------------------------------------------------------------------------------------------------------------------------|-------------------------------------------------------------------------------------------------------|-------------------|
| <b>Ruchirawa, 2002</b>        | Bangkok, Thailand              | Environmental air pollution                          | Smoking                                                                                                                                                            | Traffic policemen 41<br>Office policemen 40                                                                                                                                                                                                                         | 0.181±0.078<br>0.173±0.151                                                                            | 0.044             |
| <b>Hansen, 2004</b>           | Copenhagen, Denmark            | Environmental pollution                              | Job, gender, NAT2 phenotype, age, vehicle exhaust, cooked food mutagens, physical exercise                                                                         | Bus drivers – all 117samples<br>Mail Carriers – all 93samples                                                                                                                                                                                                       | 0.19 (Range: 0.05-1.60)<br>0.11 (Range: 0.02-0.75)                                                    | <0.001            |
| <b>Tuntawiroon, 2007</b>      | Bangkok and Chonburi, Thailand | PAH† from traffic related sources                    | Job, gender, NAT2 phenotype, age, vehicle exhaust, cooked food mutagens, physical exercise<br>Age and lifestyle (i.e. ETS†, diet, transportation, medication etc.) | Mail carriers Working outdoors 56samples<br>Mail Carriers Working indoors 37samples<br>Bangkok schoolchildren 115<br>Group matched provincial school children – Day 0 69<br>Bangkok schoolchildren Day 1 115<br>Group matched provincial school children – Day 1 69 | 0.14 (Range: 0.02-0.75)<br>0.08 (Range: 0.02-0.57)<br>0.18±0.01<br>0.1±0.01<br>0.22±0.02<br>0.12±0.01 | <0.001<br><0.0001 |
| <b>Freire, 2009</b>           | Granada, Spain                 | Residence in urban vs. rural areas                   | Exposure to ETS† and cooking appliance                                                                                                                             | 4yr old children living in urban 118<br>4yr old children living in rural areas 56                                                                                                                                                                                   | 0.060 ± 0.040<br>0.054 ± 0.055                                                                        | 0.20              |
| <b>Martinez-Salinas, 2010</b> | Mexico                         | Traffic related air pollution                        | NA                                                                                                                                                                 | Children in area with low vehicular traffic 39<br>Children in area with high vehicular traffic 17<br>Children in all communities of the study 258                                                                                                                   | 0.8 ± 0.2<br>0.2 ± 0.2                                                                                | <0.05<br>>0.05    |
| <b>Hu, 2011</b>               | Taiwan                         | Residence near a coal fired power plant (PAH in air) | NA                                                                                                                                                                 | High Exposure Community -1 146<br>High Exposure Community -2 88<br>Low Exposure Community -1 86<br>Low Exposure Community -2 49                                                                                                                                     | 0.186 ± 0.148<br>0.194 ± 0.143<br>0.113 ± 0.082<br>0.122 ± 0.089                                      | NA                |

\*P-values compared to children from all communities

† PAH polycyclic aromatic hydrocarbons; ETS environmental tobacco smoke.



**Table 4 – Results on the association between air pollution and DNA adducts in exposed individuals; linear regression, logistic regression and correlation analyses**

| First author, Year            | Area/Country          | Exposure                                                    | Controlled Confounders                                                                                                                    | Effect Measure $\neq$ | Sample Size (Total: 1787) | Subject description                                                                   | P               |
|-------------------------------|-----------------------|-------------------------------------------------------------|-------------------------------------------------------------------------------------------------------------------------------------------|-----------------------|---------------------------|---------------------------------------------------------------------------------------|-----------------|
| <b>Binkova, 1995</b>          | Czech Republic        | Outdoor air pollution – individual PAH $\dagger$            | Age, active and passive smoking, consumption of fried or smoked food, job category                                                        | r: 0.541              | 21                        | Non smoking women working outdoors up to 8 hours – gardeners or postal workers        | 0.016           |
| <b>Whyatt, 1998</b>           | Krakow, Poland        | Ambient pollution at mother’s place of residence            | Smoking, dietary PAH, use of coal stoves, home or occupational exposures to PAH & other organics                                          | $\beta$ : 1.77        | 19                        | mothers not employed away from home                                                   | 0.05            |
|                               |                       | Ambient pollution at place of residence                     | Smoking, dietary PAH, use of coal stoves, home or occupational exposures to PAH and other organics.                                       | $\beta$ : 1.73        | 23                        | newborns of mothers (high pollution / low pollution group)                            | 0.03            |
| <b>Sørensen, 2003</b>         | Copenhagen            | Personal PM2.5                                              | Smoking, diet, season                                                                                                                     | $\beta$ =-0.0035      | 75                        | Students monitored 4 seasons of a year                                                | 0.31            |
| <b>Castañó-Vinyals, 2004</b>  | Review                | B[a]P $\dagger$ (stationary meas.)                          | Not applicable                                                                                                                            | r: 0.6                | 12                        | pairs of data                                                                         | 0.038           |
| <b>Peluso, 2005</b>           | 10 European countries | O <sub>3</sub> $\dagger$ levels                             | Age, gender, educational level, country and batch                                                                                         | $\beta$ : 0.066       | 564                       | EPIC cohort subjects                                                                  | 0.0095          |
| <b>Neri, 2006</b>             | Review                | Environmental pollutants (including ETS $\dagger$ exposure) | Not applicable                                                                                                                            | Not applicable        | 178                       | Newborns – 17yr olds<br>2 studies in total – 2 with statistically significant results | Not applicable  |
| <b>Pavanello, 2006</b>        | North-East Italy      | B[a]P indoor exposure                                       | Smoking, diet, area of residence, traffic near house, outdoor exposure                                                                    | $\beta$ : 0.973       | 457                       | municipal workers (non smoking)                                                       | 0.012           |
| <b>Palli, 2008</b>            | Florence City, Italy  | PM10 $\dagger$ (from high traffic stations)                 | Smoking                                                                                                                                   | r: 0.562              | 16                        | traffic exposed workers                                                               | 0.02            |
| <b>Peluso, 2008</b>           | Thailand              | Industrial estate residence                                 | Smoking habits, age, gender                                                                                                               | OR $\dagger$ : 1.65   | 50                        | Industrial estate residents                                                           | <0.05           |
|                               |                       |                                                             |                                                                                                                                           | OR: 1.44              | 64                        | control district residents                                                            | <0.05           |
|                               |                       |                                                             |                                                                                                                                           |                       | 72                        | PAH exposed workers<br>industrial estate residents                                    | <0.05           |
| <b>Pavanello, 2009</b>        | Poland                | 1-pyrenol                                                   | NA $\dagger$                                                                                                                              | r: 0.67               | 92                        | coke oven workers and controls                                                        | <0.0001         |
| <b>Pedersen, 2009</b>         | Copenhagen, Denmark   | Residential traffic density                                 | ETS $\dagger$ , use of open fireplace, pre-pregnancy weight, folate levels, vitamin B12 levels, maternal education and season of delivery | $\beta$ : 0.6 / 0.7   | 75 /69                    | Women /umbilical cords                                                                | <0.01           |
| <b>Garcia-Suastegui, 2011</b> | Mexico City, Mexico   | PM2.5                                                       | Various risk alleles                                                                                                                      | r: NR                 | 92                        | Young adults living in Mexico City                                                    | 0.013           |
|                               |                       | PM10                                                        | Various risk alleles                                                                                                                      | r: NR                 | 92                        | Young adults living in Mexico City                                                    | 0.035           |
| <b>Herbstman, 2012</b>        | USA                   | PAH exposure – measured in both air and urine               | NA                                                                                                                                        | r: NR                 | NR                        | 152 participants – prenatal exposure, DNA adducts in cord blood                       | Not significant |

$\neq$  r = correlation coefficient;  $\beta$  =linear regression coefficient (change in DNA adduct levels (adducts/10<sup>8</sup> nucleotides) for every unit change in exposure); OR = logistic regression odds ratio  
 $\dagger$  PAH polycyclic aromatic hydrocarbons, PM10 particulate matter of diameter less than 10 microns; B[a]P Benzo [a] Pyrene; O<sub>3</sub> ozone; NA not available; ETS environmental tobacco smoke; OR odds ratio

**Table 5 – Results on the association between air pollution and DNA adducts in exposed individuals; comparison of means analysis.**

| First author, Year | Area/ Country                     | Exposure                                     | Controlled Confounders                                               | Groups Sample Size (Total: 1044)                                                                                                          | Mean adducts/ 10 <sup>8</sup> nucleotides ± SD (unless otherwise stated)   | P                            |
|--------------------|-----------------------------------|----------------------------------------------|----------------------------------------------------------------------|-------------------------------------------------------------------------------------------------------------------------------------------|----------------------------------------------------------------------------|------------------------------|
| Perera, 1991       | Poland                            | Environmental air pollution                  | NA†                                                                  | Residents in industrial area 20<br>Rural controls 21                                                                                      | 30.4±13.5<br>11.01±22.6                                                    | <0.05                        |
| Hemminki, 1994     | Stockholm, Sweden                 | Traffic related air pollution                | Age, smoking                                                         | Bus drivers – urban routes 26<br>Bus drivers – sub urban routes 23<br>Taxi drivers – mixed routes 19<br>Controls 22                       | 0.9 ± 0.35<br>1.4 ± 0.48<br>1.6 ± 0.91<br>1.0 ± 0.32                       | Non sig.<br><0.001<br><0.010 |
| Nielsen, 1996      | Denmark                           | Environmental air pollution                  | Smoking, PAH† rich diet                                              | Bus drivers in Central Copenhagen 49<br><br>Rural controls 60                                                                             | Median: 1.214<br>Range: 0.142-22.24<br>Median: 0.074<br>Range: 0.003-8.876 | 0.001                        |
| Nielsen, 1996 (2)  | Denmark and Greece                | Environmental air pollution                  | Smoking, sex                                                         | Students in urban universities 74<br>Students in agricultural colleges 29                                                                 | Median: 0.205<br>Median: 0.152                                             | 0.02                         |
| Yang 1996          | Milan, Italy                      | Traffic related air pollution                | Sex, age, smoking habits                                             | News stand workers at high traffic areas 31<br>News stand workers at low traffic areas 22                                                 | 2.2 ± 1.0<br>2.2 ± 1.2                                                     | 0.27                         |
| Topinka, 1997      | Teplice & Prachatice, N&S Bohemia | Residence in Industrial area                 | NA†                                                                  | Placenta samples- industrial polluted area (winter): GSTM– genotype 15<br>Placenta samples –agricultural area (winter): GSTM– genotype 17 | 1.49 ± 0.70<br>0.96 ± 0.55                                                 | 0.027                        |
| Merlo, 1997        | Genova, Italy                     | Ambient PAH concentrations                   | NA†                                                                  | Traffic police workers 94<br>Urban residents 52                                                                                           | 1.48 ± 1.35<br>1.01 ± 0.63                                                 | 0.007                        |
| Ruchirawa, 2002    | Bangkok, Thailand                 | Environmental air pollution                  | Smoking, sex                                                         | Traffic Policemen 41<br>Office duty policemen 40                                                                                          | 1.6±0.9<br>1.2±1.0                                                         | 0.03                         |
| Marczynski, 2005   | Germany                           | PAH in air (ambient and personal monitoring) | NA†                                                                  | Samples from 16 workers( increased PAH exposure)<br>Samples from 16 workers¥ (reduced PAH exposure)                                       | Range: 0.5 – 1.19Range: <0.5 – 0.09                                        | <0.0001                      |
| Topinka, 2007      | Prague, Czech Republic            | c-PAH† (personal exposure)                   | Smoking, occupational duration                                       | 109 policemen – January (highest exposure)<br>109 policemen – March                                                                       | 2.08±1.60<br>1.66±0.65                                                     | <0.0001                      |
| Tuntawiroon, 2007  | Bangkok and Chonburi, Thailand    | c-PAH and B[a]P†                             | Age and lifestyle (i.e. ETS†, transportation, medication, diet etc.) | Bangkok schoolchildren 115<br>Provincial school children (group matching) 69                                                              | 0.45±0.03<br>0.09±0.00                                                     | <0.0001                      |
| Fanou, 2011        | Cotonou, Benin                    | Environmental air pollution                  | NA†                                                                  | Taxi-motorbike drivers 13<br>Intermediate exposure suburban group 20                                                                      | 24.6±6.4<br>2.1±0.6                                                        | <0.001                       |
|                    |                                   | Environmental air pollution                  | NA†                                                                  | Street food vendors 16<br>Intermediate exposure suburban group 20                                                                         | 34.7±9.8<br>2.1±0.6                                                        | <0.001                       |
|                    |                                   | Environmental air pollution                  | NA†                                                                  | Gasoline salesmen 20<br>Intermediate exposure suburban group 20                                                                           | 37.2±8.1<br>2.1±0.6                                                        | <0.001                       |
|                    |                                   | Environmental air pollution                  | NA†                                                                  | Street side residents 11<br>Intermediate exposure suburban group 20                                                                       | 23.78±6.9<br>2.1±0.6                                                       | <0.001                       |

† N/A not applicable; NA not available; PAH polycyclic aromatic hydrocarbons; c-PAH carcinogenic polycyclic aromatic hydrocarbons; B[a]P benzo [a] pyrene; ETS environmental tobacco smoke

¥ The sample sizes reported in the summary tables refer to subjects with measurements available both before and after change in work conditions

**Table 6 - Results on the association between air pollution and oxidatively damaged nucleobases/deoxynucleosides in urine or mononuclear blood cells; comparison of means analysis**

| First author, Year        | Area, country                                                | Exposure definition/source Referents' definition                | Biomarker                                                | Groups Sample size (Total: 2827)                                                                | Level (Mean ± SD, unless otherwise stated)                                                  | Controlled confounders                        |
|---------------------------|--------------------------------------------------------------|-----------------------------------------------------------------|----------------------------------------------------------|-------------------------------------------------------------------------------------------------|---------------------------------------------------------------------------------------------|-----------------------------------------------|
| Suzuki 1995               | Japan                                                        | Sampling before and after a stay in a street                    | 8-oxoGua in urine (HPLC-ECD)                             | 3                                                                                               | After: 9.9±2.5<br>Before: 4.22±2.0<br>(pooled data from several timepoints 0-24 after exp.) | Cross-over study                              |
| Calderon-Garciduenas 1999 | Mexico                                                       | Children in urban and low-polluted area                         | 8-oxodG in nasal epithelial cells (immunohistochemistry) | Exposed: 86<br>Controls: 12                                                                     | 602 ± 195*<br>210 ± 122                                                                     | NA†                                           |
| Astrup 1999; Loft 1999    | Copenhagen, Denmark                                          | Bus drivers in the city center and rural/suburban controls      | 8-oxodG in urine (HPLC-ECD)                              | Exposed: 29<br>Controls: 20                                                                     | 1.74 ± 4.69<br>1.54 ± 4.29                                                                  | Age, BMI†, metabolic and DNA repair phenotype |
| Staessen 2001             | Belgium                                                      | Adolescents from industrial and rural areas                     | 8-oxodG in urine (HPLC-ECD)                              | Peer: 100<br>Wilrijk: 42<br>Hoboken: 58                                                         | 0.44 (0.40-0.48)<br>0.57 (0.49-0.66)*<br>0.49 (0.42-0.56)<br>Geometric mean and 95% CI      | Sex, smoking                                  |
| Chuang 2003               | Taiwan                                                       | Taxi-drivers and controls                                       | 8-oxodG in urine (ELISA)†                                | Exposed: 95<br>Controls: 75                                                                     | 0.33±0.20*<br>0.20 ± 0.14                                                                   | Age, education, exercise                      |
| Lai 2005                  | Taipei city, Taiwan                                          | Highway toll station workers and controls                       | 8-oxodG in urine (ELISA)                                 | Exposed: 47<br>Controls: 24                                                                     | 13.3±7.1*<br>8.4±6.2                                                                        | Age, smoking                                  |
| Harri 2005                | Finland                                                      | Garage/waste workers and controls                               | 8-oxodG in urine and MNBC (HPLC-ECD)                     | <b>Urine:</b><br>Exposed: 29<br>Controls: 36<br><br><b>MNBC:</b><br>Exposed: 19<br>Controls: 18 | Winter:<br>1.52 ± 0.44<br>1.56 ± 0.61<br>Summer:<br>1.61±0.33<br>1.43±0.4                   | Age, smoking, BMI                             |
| Vinzents 2005             | Copenhagen, Denmark                                          | Sampling after cycling in traffic-intense streets or laboratory | FPG sites in MNBC                                        | 15                                                                                              | Traffic: 0.08 (0-0.04)*<br>Lab: 0.02 (0-0.04)                                               | Cross-over study                              |
| Avogbe 2005               | Rep. of Benin                                                | Subjects from urban and rural areas                             | FPG sites in MNBC                                        | Taximoto: 24<br>Roadside: 37<br>Suburban: 42<br>Rural: 27                                       | 1620 ± 310*<br>1250 ± 198*<br>1110 ± 188*<br>650 ± 160                                      | Metabolic genes                               |
| Fanou 2006                | Rep. of Benin                                                | Taxi-moto drivers and controls                                  | 8-oxodG in MNBC (HPLC-ECD)                               | Exposed: 35<br>Controls: 6                                                                      | 2.05±1.25*<br>1.11±0.82                                                                     | NA†                                           |
| Cavallo 2006              | Italy                                                        | Airport personnel and controls                                  | FPG sites in MNBC                                        | Exposed: 41<br>Controls: 31                                                                     | 55.86 ± 12.85*<br>43.01 ± 7.97                                                              | Age, smoking, dietary habits                  |
| Bräuner 2007              | Copenhagen, Denmark                                          | Sampling before and after controlled exposure to street PM      | FPG sites in MNBC                                        | 29                                                                                              | Air: 0.53 (0.37-0.65)*<br>FA†: 0.38 (0.31-0.53)<br>Median and quartiles                     | Age, sex, smoking, CVD†, BMI                  |
| Singh 2007                | Prague (Czech Rep.)<br>Kosice (Slovakia)<br>Sofia (Bulgaria) | City policemen, bus drivers and controls                        | 8-oxodG (LC-MS/MS)<br>M1dG (immunoslot blot)<br>In MNBC  | Exposed: 98<br>Controls: 105<br>Exposed: 198<br>Controls: 156                                   | 33.0±30.1<br>29.2±21.2<br>58.3±37.5<br>49.2±30.3                                            | Smoking, demographic variables, diet          |
| Novotna 2007              | Prague, Czech Rep.                                           | Policemen and controls sampled in different seasons             | ENDOIII/FPG sites in MNBC                                | Exposed: 54<br><br>Controls: 11                                                                 | Jan: 2.91± 1.84*<br>Sep: 2.12 ± 1.62<br>Jan: 1.36± 1.53<br>Sep: 1.22 ± 0.96                 | Metabolic and DNA repair genotypes            |
| Rossner, Jr. 2007,        | Prague, Czech Rep.                                           | Bus drivers and controls sampled in                             | 8-oxodG in urine                                         | Exposed: 50                                                                                     | 7.59 ± 2.25*                                                                                | Medical history, lifestyle                    |

|                          |                                     |                                                             |                                                                                       |                                                   |                                                                                  |                                                                                                    |
|--------------------------|-------------------------------------|-------------------------------------------------------------|---------------------------------------------------------------------------------------|---------------------------------------------------|----------------------------------------------------------------------------------|----------------------------------------------------------------------------------------------------|
| <b>2008</b>              |                                     | there different seasons                                     | (ELISA)                                                                               |                                                   | 6.73 ± 2.48*                                                                     |                                                                                                    |
|                          |                                     |                                                             |                                                                                       | Controls: 50                                      | 5.67 ± 2.50*                                                                     |                                                                                                    |
|                          |                                     |                                                             |                                                                                       |                                                   | 6.29 ± 2.59                                                                      |                                                                                                    |
|                          |                                     |                                                             |                                                                                       |                                                   | 5.51 ± 2.36                                                                      |                                                                                                    |
|                          |                                     |                                                             |                                                                                       |                                                   | 3.82 ± 1.73                                                                      |                                                                                                    |
| <b>Buthumrung 2008</b>   | Thailand                            | Schoolchildren in Bangkok and rural controls                | 8-oxodG in leukocytes and urine (HPLC-ECD)                                            | Exposed: 40<br>Controls: 32                       | 0.25 ± 0.13<br>0.08 ± 0.34                                                       | Metabolic genes                                                                                    |
|                          |                                     |                                                             |                                                                                       | Exposed 43<br>Controls: 32                        | 2.16 ± 1.84<br>1.32 ± 1.24                                                       |                                                                                                    |
| <b>Danielsen 2008</b>    | Sweden                              | Sampling before and after controlled exposure to wood smoke | 8-oxodG<br>8-oxoGua in urine:<br>HPLC-GC/MS<br>FPG sites in MNBC<br>FPG sites in MNBC | 13                                                | 16.4% (95% CI: -6.9,45.5)<br>79.3% (95% CI -12.9,269)<br>-15% (95% CI:-31.1,4.9) | Cross-over study                                                                                   |
| <b>Palli 2009</b>        | Florence, Italy                     | Metropolitan area                                           |                                                                                       | Exposed 44<br>Controls: 27                        | 5.0 ± 3.06<br>4.11 ± 3.96                                                        | Sex, smoking, season                                                                               |
| <b>Svecova 2009</b>      | Teplice and Prachatice (Czech Rep.) | Children                                                    | 8-oxodG in urine (ELISA)                                                              | Teplice: 495<br>Prachatice:399                    | 14.6 (3.1-326.5)<br>15.2 (3.0-180.8)                                             | Ethnicity, mothers smoking, education, sex, age, atopic diseases                                   |
| <b>Bagryantseva 2010</b> | Praque, Czech Rep.                  | Bus drivers, garage men and office workers                  | 8-oxodG in urine (ELISA)                                                              | Bus drivers: 50<br>Garage men: 20<br>Controls: 50 | 5.67 ± 2.5*<br>6.54 ± 6.9*<br>3.82 ± 1.73                                        | Age, vitamins, plasma lipids, metabolic and DNA repair genes                                       |
|                          |                                     |                                                             | EndoIII/Fpg sites in lymphocytes                                                      | Bus drivers: 50<br>Garage men: 20<br>Controls: 50 | 2.35 ± 2.17<br>2.56 ± 2.52<br>2.55 ± 2.86                                        |                                                                                                    |
| <b>Han 2010</b>          | Taiwan                              | Bus drivers and office workers                              | 8-oxodG in urine (ELISA)                                                              | Exposed: 120<br>Controls: 58                      | 9.5 ± 5.7*<br>7.3 ± 5.4                                                          | Age, BMI, smoking. Alcohol, areca chewing, tea, coffee energy drink, exercise                      |
| <b>Fan 2011</b>          | GuangZhou City, China               | Children                                                    | 8-oxodG in urine (ELISA)                                                              | Exposed: 39<br>Controls: 35                       | 20.87 ± 14.42<br>16.78 ± 13.30                                                   | Age, sex, height, weight, passive smoking, diet, transportation tool and time taken to/from school |
| <b>Rossner, Jr, 2011</b> | Praque and Ostrava (Czech Rep.)     | Policemen and office workers                                | 8-oxodG in urine (ELISA)                                                              | Ostrava: 75<br>Praque: 65                         | 4.28 ± 2.27<br>4.84 ± 1.61                                                       | Age, passive smoking, cotinine, plasma lipids, vitamins, DNA repair gens                           |

† BMI body mass index; NA not available; CVD cardiovascular disease; ELISA enzyme-linked immunosorbent assay; FA filtered air

**Table 6a. Confounding in studies of DNA adducts**

| <b>Adjustment</b>                                                    | <b>Number of studies</b> | <b>References</b>                                                                                                   |
|----------------------------------------------------------------------|--------------------------|---------------------------------------------------------------------------------------------------------------------|
| <b>Several relevant confounders including smoking but not diet</b>   | <b>7</b>                 | <b>Hemminki 1994, Nielsen 1996, Peluso 2005, Peluso 2008, Ruchirawa 2002, Topinka 2007, Yang 1996,</b>              |
| <b>Several relevant confounders including smoking including diet</b> | <b>7</b>                 | <b>Binkova 1995, Nielsen 1996 (2), Pavanello 2006, Pedersen 2009, Sorensen 2003, Tuntawiroon 2007, Whyatt 1998,</b> |
| <b>Smoking</b>                                                       | <b>1</b>                 | <b>Palli 2008</b>                                                                                                   |
| <b>Various Risk Alleles</b>                                          | <b>1</b>                 | <b>Garcia-Suastegui 2011</b>                                                                                        |
| <b>Confounding not relevant</b>                                      | <b>1</b>                 | <b>Marczynski 2005</b>                                                                                              |
| <b>No information about confounding factors</b>                      | <b>6</b>                 | <b>Ayi Fanou 2011, Herbstman 2012, Merlo 1997, Pavanello 2009, Perera 1991, Topinka 1997</b>                        |

**Table 7 - Results on the association between air pollution and oxidatively damaged nucleobases/deoxynucleosides in urine or mononuclear blood cells; linear regression and correlation analysis**

| First author, year | Area, country                   | Exposure definition/source                                      | Biomarkers and methods                                            | Sample size (Total: 1642)      | Effect Measure $\neq$                                                                                                                | Controlled confounders                                                               |
|--------------------|---------------------------------|-----------------------------------------------------------------|-------------------------------------------------------------------|--------------------------------|--------------------------------------------------------------------------------------------------------------------------------------|--------------------------------------------------------------------------------------|
| Lagorio 1994       | Rome Italy                      | Filling station attendants                                      | 8-oxodG in urine (HPLC-ECD)                                       | 65                             | $r = 0.34^*$ (benzene)                                                                                                               | Age, length of employment, smoking, exposure to X-ray                                |
| Sørensen 2003a     | Copenhagen, Denmark             | Students living in the metropolitan area                        | 8-oxodG (HPLC-ECD) in urine and MNBC<br>FPG/EndoIII sites in MNBC | 50                             | $\beta = 0.010^*$ (8-oxodG, lymphocytes)<br>$\beta = -0.007$ (8-oxodG, urine)<br>$\beta = 0.0025$ (EndoIII)<br>$\beta = 0.014$ (FPG) | Season, sex, outdoor temperature                                                     |
| Sørensen 2003b     | Copenhagen, Denmark             | Healthy subjects living in the metropolitan area                | FPG/EndoIII sites in MNBC<br>8-oxodG (HPLC-ECD) in urine and MNBC | 40                             | $r_s = 0.39^*$                                                                                                                       | Smoking, type of work, sex, genotype (metabolism)                                    |
| Vinzents 2005      | Copenhagen, Denmark             | Sampling after cycling in traffic-intense streets or laboratory | FPG sites in MNBC                                                 | 15                             | Non-significant<br>$\beta = 1.5 \times 10^{-3}$ per ultrafine particle time weighted exposure unit                                   | Cross-over study                                                                     |
| Bräuner 2007       | Copenhagen, Denmark             | Sampling before and after controlled exposure to street PM      | FPG sites in MNBC                                                 | 29                             | NC <sub>12</sub> †: $\beta = -0.033$<br>NC <sub>23</sub> : $\beta = 0.066^*$<br>NC <sub>57</sub> : $\beta = 0.040^*$                 | Age, sex, smoking, CVD†, BMI† included in model                                      |
| Chuang 2007        | Taipei, Taiwan                  | College students living in the metropolitan area                | 8-oxodG in plasma (ELISA)                                         | 76                             | PM10: -9.2%, (95% CI: -21.5;3.2)<br>PM2.5: -5.0% (95% CI: -14.3-4.4)<br>O3: 2.2% (95% CI: 0.9;3.5)                                   | Sex, age, BMI, weekday, temperature, relative humidity                               |
| De Coster 2008     | Flanders, Belgium               | Industrial and urban areas                                      | 8-oxodG in urine (ELISA)                                          | 399                            | $\beta = 0.179$ (95% CI: 0.077-0.282) with 1-OHP as biomarker of internal exposure                                                   | Age, Sex, recent smoking                                                             |
| Svecova 2009       | Teplice&Prachatice (Czech Rep.) | Children living in the two areas                                | 8-oxodG in urine (ELISA)                                          | Teplice: 495<br>Prachatice:399 | $\beta = 0.16^*$ (air pollutants)                                                                                                    | Ethnicity, mothers smoking, education, sex, age, atopic diseases                     |
| Allen 2009         | Washington, USA                 | Subjects with MetS with controlled exposure to diesel exhaust   | 8-oxodG in urine (ELISA) †                                        | 10                             | $\beta = 0.087$ (95% CI: -0.13; 0.31)                                                                                                | Cross-over study                                                                     |
| Kim 2009           | Boston, USA                     | Subjects with hypertension and controls (panel study)           | 8-oxodG in urine (ELISA)                                          | 21                             | $\beta = -0.60$ (hypertensive)<br>$\beta = 1.1$ (controls)                                                                           | Age, sex, smoking, time of the day                                                   |
| Bagryantseva 2010  | Praque, Czech Rep.              | Bus drivers, garage men and office workers                      | 8-oxodG in urine (ELISA)                                          | 120                            | $\beta = 0.105$ /BaP<br>$\beta = 0.026$ (PAH)                                                                                        | Age, vitamins, plasma lipids, metabolic and DNA repair genes                         |
|                    |                                 |                                                                 | EndoIII/FPG sites in lymphocytes                                  | 120                            | $\beta = -0.62$ (BaP)<br>$\beta = -0.056$ (PAH)                                                                                      |                                                                                      |
| Lee 2010           | Taiwan                          | Inspection station workers and controls                         | 8-oxodG in urine (ELISA)                                          | Exposed:11<br>Controls: 32     | $\beta = 7.47$ (SE = 3.3)*<br>$r = 0.055$ (OH-PAH)                                                                                   | Smoking, cooking at home                                                             |
| Fan 2011           | GuangZhou City, China           | Children in a kindergarten                                      | 8-oxodG in urine (ELISA)                                          | 74                             |                                                                                                                                      | Age, sex, height, weight, passive smoking, diet, transportation to/from kindergarten |
| Mori 2011          | Tokyo                           | Children in a kindergarten                                      | 8-oxodG in urine (ELISA)                                          | 76                             | $\beta = 0.216$ (Ln(1-OHP))                                                                                                          | Age, sex, Mn, As, vitamin A, vitamin C, cotinine                                     |
| Ren 2011           | Boston, USA                     | Eldery subjects                                                 | 8-oxodG in urine (ELISA)                                          | 320                            | PM2.5: 30.8% (95% CI: 9.3-52.2)                                                                                                      | Age, BMI, smoking, vitamins                                                          |
| Rossner, Jr 2011   | Praque, Czech Rep.              | Policemen                                                       | 8-oxodG in urine (ELISA)                                          | 59                             | $\beta = 0.04^*$ (PM2.5 stationary monitoring station)<br>$\beta = 0.16$ (BaP)<br>$\beta = -0.02$ (PAH)                              | Age, cotinine, cholesterol, triglycerides                                            |

$\neq r$  = correlation coefficient;  $\beta$  = linear regression coefficient (change in levels of oxidatively damaged nucleobases for every unit change in exposure); % per cent difference

† MetS metabolic syndrome; ELISA enzyme-linked immunosorbent assay; BMI body mass index; CVD cardiovascular disease, NC<sub>size cut off</sub> Number concentration.

**Table 7a. Confounding in studies of oxidative damaged to nucleobases in blood or urine**

| <b>Adjustment</b>                                     | <b>Number of studies</b> | <b>References</b>                                                                                                                                                                                                                                                                                          |
|-------------------------------------------------------|--------------------------|------------------------------------------------------------------------------------------------------------------------------------------------------------------------------------------------------------------------------------------------------------------------------------------------------------|
| <b>Several relevant confounders including smoking</b> | <b>23</b>                | <b>Astrup 1999, Brauner 2007, Cavallo 2006, Chuang 2003, Chuang 2007, De Coster 2008, Fan 2011, Han 2011, Harri 2005, Kim 2009, Lagorio 1994, Lai 2005, Lee 2010, Loft 1999, Palli 2009, Ren 2011, Rossner 2007, Singh 2007, Sorensen 2003a, Sorensen 2003b, Staessen 2001, Svecova 2008, Svecova 2009</b> |
| <b>Metabolic and/or DNA repair gene polymorphisms</b> | <b>5</b>                 | <b>Avogbe 2005, Bagryantseva2010, Buthbumrung 2008, Novotna 2007, Rossner 2011</b>                                                                                                                                                                                                                         |
| <b>Confounding not relevant</b>                       | <b>4</b>                 | <b>Allen 2009, Danielsen 2008, Suzuki 1995, Vinzents 2005,</b>                                                                                                                                                                                                                                             |
| <b>No information about confounding factors</b>       | <b>2</b>                 | <b>Ayi Fanou 2006, Calderón-Garcidueñas 1999,</b>                                                                                                                                                                                                                                                          |

**Table 8 – Results on the association between air pollution and CAs in the cells of exposed individuals; logistic regression and comparison of means analyses.**

| First author, Year     | Area/Country                                              | Exposure                                                 | Controlled Confounders                                                                                                                                           | Groups<br>Sample Size (Total: 1265)                                                           | Mean (% frequencies) $\Delta$ $\pm$ SD             | P               |
|------------------------|-----------------------------------------------------------|----------------------------------------------------------|------------------------------------------------------------------------------------------------------------------------------------------------------------------|-----------------------------------------------------------------------------------------------|----------------------------------------------------|-----------------|
| Knudsen, 1999          | Copenhagen, Denmark                                       | Air pollution (urban)                                    | Metabolic genotypes, DNA repair, age, sex                                                                                                                        | office workers 41                                                                             | 2.46 $\pm$ 1.98                                    | Not significant |
|                        |                                                           |                                                          |                                                                                                                                                                  | postal workers 60                                                                             | 2.12 $\pm$ 1.38                                    |                 |
| Sram 1999              | Czech Republic                                            | Urban air pollution                                      | Maternal height and pre-pregnancy weight, parity, marital status, education and maternal smoking, season and the year of the study                               | Bus drivers – high exposure 55                                                                | 2.84 $\pm$ 1.87                                    | Not significant |
|                        |                                                           |                                                          |                                                                                                                                                                  | Bus drivers – low + medium exposure 45                                                        | 2.24 $\pm$ 1.57                                    |                 |
| Kyrtopoulos, 2001      | Athens and Halkida, Greece                                | Air pollution (in city of studying)                      | Smoking                                                                                                                                                          | Pregnant Mothers: Industrial + residential heating (Teplice) 131                              | 1.54 $\pm$ NA <sup>†</sup>                         | <0.05           |
|                        |                                                           |                                                          |                                                                                                                                                                  | Pregnant Mothers: Residents in agricultural districts (Prachatice) 48                         | 1.04 $\pm$ NA <sup>†</sup>                         |                 |
| Burgaz, 2002           | Ankara, Turkey                                            | Air pollution (traffic related)                          | Age, sex, smoking habits                                                                                                                                         | Students in Athens (higher PAH <sup>†</sup> exposure & lower PM2.5 <sup>†</sup> exposure) 222 | 0.88 $\pm$ 0.97                                    | Not significant |
|                        |                                                           |                                                          |                                                                                                                                                                  | Students in Halkida (lower PAH exposure & higher PM2.5 exposure) 149                          | 1.06 $\pm$ 1.12                                    |                 |
| Sram, 2007             | Prague, Czech Republic                                    | c-PAHs <sup>†</sup> on respirable air particles (<2.5 m) | Smoking, medical histories                                                                                                                                       | Traffic policemen 18                                                                          | 1.29 $\pm$ 0.30                                    | <0.05           |
|                        |                                                           |                                                          |                                                                                                                                                                  | Control group 5                                                                               | 0.26 $\pm$ 0.14                                    |                 |
| Zidzik, 2007           | Kosice (Slovakia), Prague(Cz.Republic) & Sofia (Bulgaria) | cPAH                                                     | Sex                                                                                                                                                              | Taxi drivers 29                                                                               | 1.82 $\pm$ 0.34                                    | <0.01           |
|                        |                                                           |                                                          |                                                                                                                                                                  | Control group 5                                                                               | 0.26 $\pm$ 0.14                                    |                 |
| Balachandar, 2008      | Tamilnadu, India                                          | ETS <sup>†</sup>                                         | Age                                                                                                                                                              | Sampling in January: higher PM <sup>†</sup> and PAH exposures 61                              | 0.27 $\pm$ 0.18                                    | <0.001          |
|                        |                                                           |                                                          |                                                                                                                                                                  | Sampling in March: lower PM and PAH exposures 61                                              | 0.16 $\pm$ 0.17                                    |                 |
| Rossnerova, 2011       | Prague and Ceske Budejovice, Czech Republic               | Air pollution (urban vs. rural)                          | Sex                                                                                                                                                              | Exposed policemen in Kosice 51                                                                | 2.6 $\pm$ 2.64                                     | Not significant |
|                        |                                                           |                                                          |                                                                                                                                                                  | Controls in Kosice 55                                                                         | 2.14 $\pm$ 1.61                                    |                 |
| Garcia-Suastegui, 2011 | Mexico City, Mexico                                       | Air pollution – PM10                                     | Unadjusted                                                                                                                                                       | Exposed policemen in Prague 52                                                                | 2.33 $\pm$ 1.53                                    | Not significant |
|                        |                                                           |                                                          |                                                                                                                                                                  | Controls in Prague 50                                                                         | 1.94 $\pm$ 1.28                                    |                 |
| Rossner, 2011          | Prague and Ostrawa, Czech Republic                        | Air pollution at residence                               | Age, benzene exposure, cotinine plasma levels, total, HDL, and LDL cholesterol levels, triglycerides, Vitamins a, C and E in plasma and various gene expressions | Exposed policemen in Sofia 50                                                                 | 3.04 $\pm$ 1.64                                    | <0.05           |
|                        |                                                           |                                                          |                                                                                                                                                                  | Controls in Sofia 45                                                                          | 1.79 $\pm$ 0.77                                    |                 |
| Garcia-Suastegui, 2011 | Mexico City, Mexico                                       | Air pollution – PM2.5                                    | Unadjusted                                                                                                                                                       | Exposed bus drivers in Sofia 50                                                               | 3.6 $\pm$ 1.63                                     | <0.05           |
|                        |                                                           |                                                          |                                                                                                                                                                  | Controls in Sofia 45                                                                          | 1.79 $\pm$ 0.77                                    |                 |
| Garcia-Suastegui, 2011 | Mexico City, Mexico                                       | Air pollution – PM10                                     | Unadjusted                                                                                                                                                       | Group I : <6hrs exposure/day and <30yrs old                                                   | 5.00 $\pm$ 1.68,                                   | Significant     |
|                        |                                                           |                                                          |                                                                                                                                                                  | Passive smokers 18                                                                            | 1.16 $\pm$ 0.92,                                   |                 |
| Garcia-Suastegui, 2011 | Mexico City, Mexico                                       | Air pollution – PM2.5                                    | Unadjusted                                                                                                                                                       | Group II : >6hrs exposure/day and >30yrs old                                                  | 9.04 $\pm$ 3.73                                    | Significant     |
|                        |                                                           |                                                          |                                                                                                                                                                  | Passive smokers 25                                                                            | 2.76 $\pm$ 2.12.                                   |                 |
| Garcia-Suastegui, 2011 | Mexico City, Mexico                                       | Air pollution – PM2.5                                    | Unadjusted                                                                                                                                                       | Mothers in Prague (urban) 86                                                                  | 0.80 $\pm$ 0.27                                    | <0.001          |
|                        |                                                           |                                                          |                                                                                                                                                                  | Mothers in Ceske Budejovice (rural) 92                                                        | 0.61 $\pm$ 0.21                                    |                 |
|                        |                                                           |                                                          |                                                                                                                                                                  |                                                                                               | <b>Linear Regression Coefficient (95% CI)</b>      |                 |
| Garcia-Suastegui, 2011 | Mexico City, Mexico                                       | Air pollution – PM10                                     | Unadjusted                                                                                                                                                       | 91 individuals sampled during dry season                                                      | NA                                                 | 0.669           |
|                        |                                                           |                                                          |                                                                                                                                                                  | 80 individuals sampled during rainy season                                                    | NA                                                 | 0.399           |
| Garcia-Suastegui, 2011 | Mexico City, Mexico                                       | Air pollution – PM10                                     | Unadjusted                                                                                                                                                       | 91 individuals sampled during dry season                                                      | NA                                                 | 0.709           |
|                        |                                                           |                                                          |                                                                                                                                                                  | 80 individuals sampled during rainy season                                                    | NA                                                 | 0.843           |
|                        |                                                           |                                                          |                                                                                                                                                                  |                                                                                               | <b>Logistic regression OR<sup>∞</sup> (95% CI)</b> |                 |
| Rossner, 2011          | Prague and Ostrawa, Czech Republic                        | Air pollution at residence                               | Age, benzene exposure, cotinine plasma levels, total, HDL, and LDL cholesterol levels, triglycerides, Vitamins a, C and E in plasma and various gene expressions | Subjects in Prague (less polluted) 64<br>Subjects in Ostrawa (more polluted) 75               | 0.18 (0.05-0.67) <sup>∞</sup>                      | 0.010           |



† NA not available; PAH polycyclic aromatic hydrocarbons; PM2.5 particulate matter with diameter less than 2.5 microns; N/A not applicable; c-PAH carcinogenic polycyclic aromatic hydrocarbons; ETS environmental tobacco smoke.

Δ Percentage of cells with chromosomal aberrations

<sup>∞</sup> Odds ratio of having chromosomal aberrations above median, for subjects in Prague compared to subjects in Ostrava

**Table 9 – Results on the association between air pollution and MN in peripheral blood cells of exposed individuals: linear regression analyses**

| First Author, Year | Area/ Country                               | Exposure                                                                             | Controlled Confounders                                                                                                                 | Effect Measure $\neq$                           | Sample Size (Total: 1478) | Subject description                                                                     | p      |
|--------------------|---------------------------------------------|--------------------------------------------------------------------------------------|----------------------------------------------------------------------------------------------------------------------------------------|-------------------------------------------------|---------------------------|-----------------------------------------------------------------------------------------|--------|
| Neri, 2006         | Review                                      | Environmental Pollutants                                                             | Not applicable                                                                                                                         |                                                 | 1071                      | Children: 1-16 yrs old<br>4 studies in total – 4 with statistically significant results |        |
| Ishikawa, 2006     | Shenyang city, China                        | Air pollution (ambient)                                                              | Smoking habits, sex, age, metabolic enzyme and DNA repair gene polymorphisms                                                           | $\beta$ : 1.57                                  | 66                        | Female industrial                                                                       | <0.05  |
| Pedersen, 2009     | Copenhagen, Denmark                         | Residential traffic density (validated by indoor levels of nitrogen dioxide and PAH) | ETS exposure, use of open fireplace, prepregnancy weight, folate levels, vitamin B12 levels, maternal education and season of delivery | $\beta$ : -0.1<br>$\beta$ : 0.4                 | 75<br>69                  | Women<br>Umbilical cords                                                                | 0.02   |
|                    |                                             |                                                                                      |                                                                                                                                        | <b>Mean (% frequencies) <math>\pm</math> SD</b> |                           |                                                                                         |        |
| Merlo, 1997        | Genova, Italy                               | Ambient PAH concentrations                                                           | Sex                                                                                                                                    | 3.73 $\pm$ 1.6<br>4.03 $\pm$ 1.61               | 82<br>52                  | Traffic police workers<br>Urban residents                                               | 0.38   |
| Rossnerova, 2011   | Prague and Ceske Budejovice, Czech Republic | Air pollution (urban vs. rural)                                                      | Sex                                                                                                                                    | 8.35 $\pm$ 3.06<br>6.47 $\pm$ 2.35              | 86<br>92                  | Mothers in Prague (urban)<br>Mothers in Ceske Budejovice (rural)                        | <0.001 |

$\neq \beta$  = linear regression coefficient (change in micronuclei frequencies ( frequency per 1000 cells) per unit change in exposure)

† PBLs peripheral blood lymphocytes; N/A not applicable; PM10 particulate matter with diameter less than 10 microns; polycyclic aromatic hydrocarbons.

**Table 10 - Results on the association between air pollution and methylation changes in the cells of exposed individuals.**

| First author, Year | Area/Country                                     | Exposure                                                                                                                                | Outcome                                                                   | Controlled Confounders                                                                                                                                                                                            | Effect Measure $\neq$ | CI $\dagger$    | Sample Size (Total: 1499) | Subject description                     | P                        |
|--------------------|--------------------------------------------------|-----------------------------------------------------------------------------------------------------------------------------------------|---------------------------------------------------------------------------|-------------------------------------------------------------------------------------------------------------------------------------------------------------------------------------------------------------------|-----------------------|-----------------|---------------------------|-----------------------------------------|--------------------------|
| Baccarelli, 2007   | Boston, USA                                      | Ambient Black Carbon (hourly concentrations measured at a monitoring site approximately 1 km from the site of examination (7 day mean)) | LINE-1 methylation                                                        | Multiple clinical and environmental covariates                                                                                                                                                                    | r: -0.11              | (-0.18) (-0.04) | 718                       | subjects from the Normative Aging Study | 0.002<br>Not significant |
|                    |                                                  | Ambient Black Carbon (hourly concentrations measured at a monitoring site approximately 1 km from the site of examination (7 day mean)) | Alu methylation                                                           | Multiple clinical and environmental covariates                                                                                                                                                                    |                       |                 |                           |                                         |                          |
| Baccarelli, 2009   | Boston, USA                                      | PM2.5 $\dagger$ concentrations (7day mean)                                                                                              | LINE-1 methylation                                                        | Age, BMI, cigarette smoking, pack-years, statin use, fasting blood glucose, diabetes mellitus, percent lymphocytes, and neutrophils in differential blood count, day of the week, season, and outdoor temperature | r: -0.13              | (-0.19) (-0.06) | 718                       | subjects from the Normative Aging Study | <0.001                   |
|                    |                                                  | PM2.5 concentrations (7day mean)                                                                                                        | Alu methylation                                                           | Age, BMI, cigarette smoking, pack-years, statin use, fasting blood glucose, diabetes mellitus, percent lymphocytes, and neutrophils in differential blood count, day of the week, season, and outdoor temperature | r: -0.01              | (-0.07) (0.05)  |                           |                                         |                          |
| Tarantini, 2009    | Brescia, Northern Italy                          | PM10 (first day of the week and after 3 days of work)                                                                                   | LINE-1 methylation                                                        | Unadjusted                                                                                                                                                                                                        | 0.02%                 | SE: 0.11        | 63                        | workers                                 | 0.89                     |
|                    |                                                  | PM10 (first day of the week and after 3 days of work)                                                                                   | Alu methylation                                                           | Unadjusted                                                                                                                                                                                                        | 0%                    | SE: 0.08        |                           |                                         | 0.99                     |
|                    |                                                  | PM10 (first day of the week and after 3 days of work)                                                                                   | iNOS promoter methylation                                                 | Unadjusted                                                                                                                                                                                                        | -0.61%                | SE: 0.26        |                           |                                         | 0.02                     |
|                    |                                                  | PM10 (average level of individual exposure)                                                                                             | LINE-1 methylation                                                        | Age, BMI, smoking, number of cigarettes/day                                                                                                                                                                       | $\beta$ : -0.34       | SE: 0.09        |                           |                                         | 0.04                     |
|                    |                                                  | PM10 (average level of individual exposure)                                                                                             | Alu methylation                                                           | Age, BMI, smoking, number of cigarettes/day                                                                                                                                                                       | $\beta$ : -0.19       | SE: 0.17        |                           |                                         | 0.04                     |
|                    |                                                  | PM10 (average level of individual exposure)                                                                                             | iNOS promoter methylation                                                 | Age, BMI, smoking, number of cigarettes/day                                                                                                                                                                       | $\beta$ : -0.55       | SE: 0.58        |                           |                                         | 0.34                     |
|                    |                                                  | PM10 (average level of individual exposure)                                                                                             | LINE1                                                                     | Season, time, smoking, BMI, alcohol intake, medication, batch, % WBC type                                                                                                                                         | 0.03%                 | (-0.12) (0.18)  |                           |                                         | 706                      |
|                    | Alu                                              |                                                                                                                                         | 0.03%                                                                     | (-0.07) (0.13)                                                                                                                                                                                                    | Not Significant       |                 |                           |                                         |                          |
|                    | Black Carbon (IQR increase over a 90 day period) | LINE1                                                                                                                                   | Season, time, smoking, BMI, alcohol intake, medication, batch, % WBC type | -0.21%                                                                                                                                                                                                            | (-0.50) (0.09)        | Not Significant |                           |                                         |                          |
|                    |                                                  | Alu                                                                                                                                     |                                                                           | -0.31%                                                                                                                                                                                                            | (-0.12) (-0.50)       | P<0.05          |                           |                                         |                          |
|                    | SO4 (IQR increase over a 90 day period)          | LINE1                                                                                                                                   | Season, time, smoking, BMI, alcohol intake, medication, batch, % WBC type | -0.27%                                                                                                                                                                                                            | (-0.02) (-0.52)       | P<0.05          |                           |                                         |                          |
|                    |                                                  | Alu                                                                                                                                     |                                                                           | -0.03%                                                                                                                                                                                                            | (-0.20) (0.13)        | Not Significant |                           |                                         |                          |
| Herbstman, 2012    | New York, USA                                    | PAH exposure – prenatal                                                                                                                 | Global Methylation                                                        | Ethnicity                                                                                                                                                                                                         | $\beta$ : -0.11       | (-0.21) (0.00)  | 164                       | cord blood samples                      | 0.05                     |

≠  $r$  = correlation coefficient;  $\beta$  = linear regression coefficient (change in DNA methylation levels (%**5mC**) per unit change in exposure); % per cent difference  
† CI confidence interval; LINE-1 long interspersed nuclear element-1; PM10 particulate matter with diameter of less than 10 microns; tHcy total homocysteine; BMI body mass index; PM2.5 particulate matter with diameter of less than 2.5 microns; PAH polycyclic aromatic hydrocarbons.

**Figure 1 - Flow Chart of Literature Review**

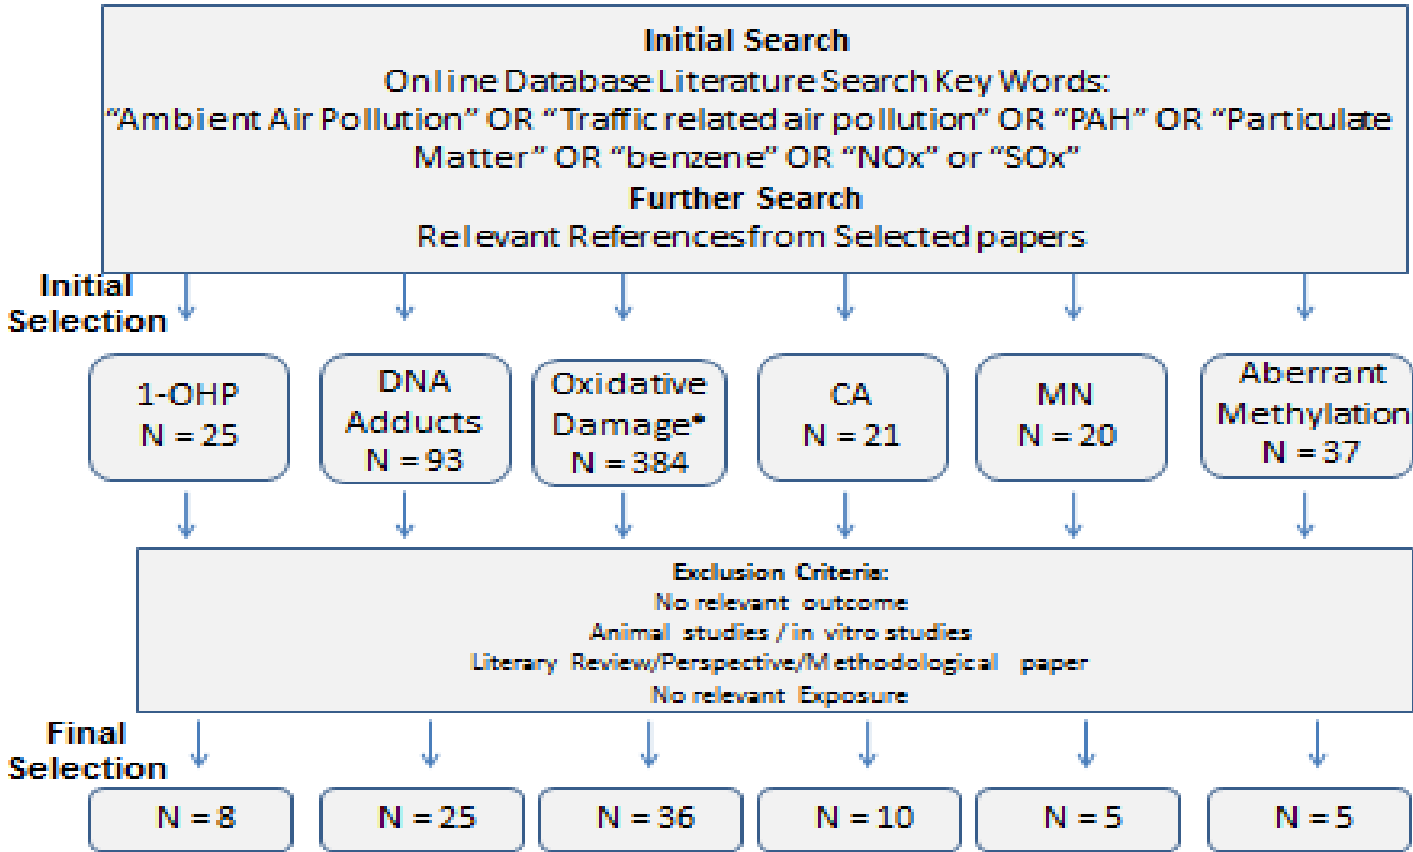

\* For oxidative damage search terms also included: "diesel exhaust", "wood smoke", and "biomass".

Figure 2 – Putative Mechanisms of cancer through oxidative damage from air pollution

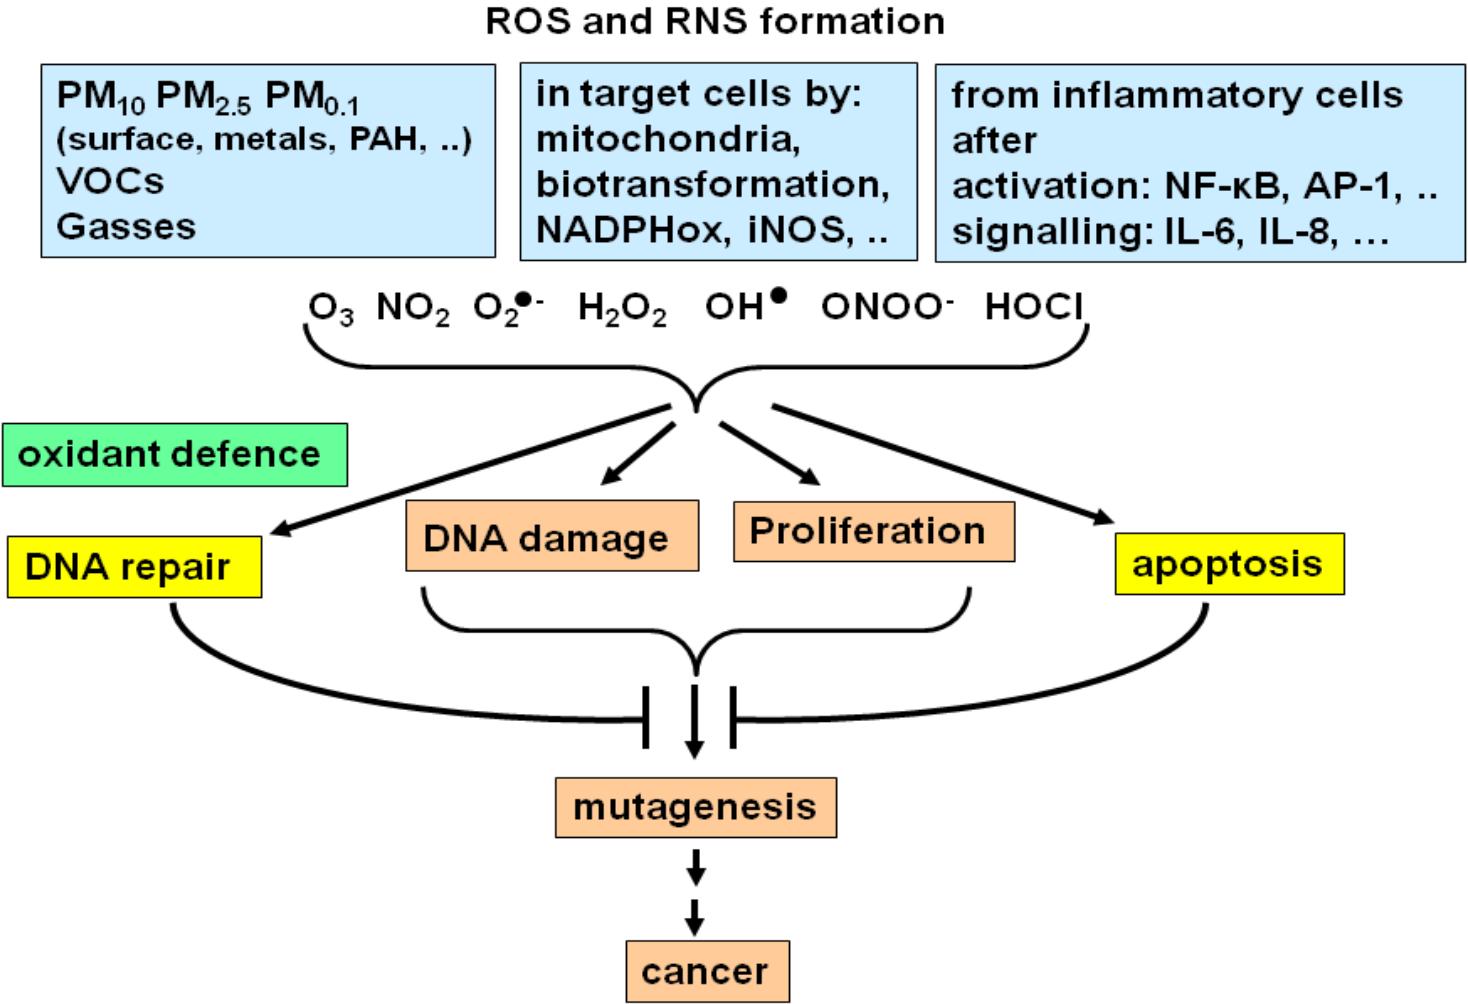

Adapted from: Risom, L, P. Møller, and S. Loft (2005) Oxidative stress-induced DNA damage by air pollution, Mutat. Res. 592:119-137

**Figure 3 - Funnel plot of the standard error of the standardized mean difference (SMD) vs the SMD of studies on DNA adducts (in a fixed effects model to get the pseudo CI lines).**

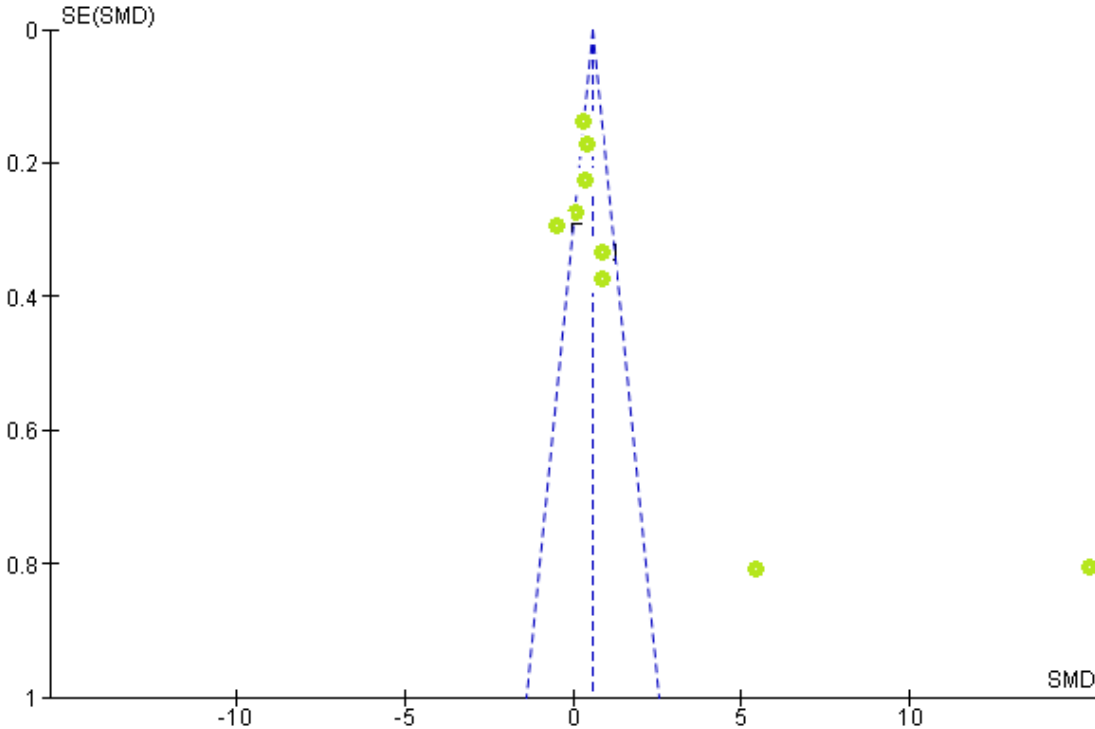

NOTE: Three studies not reporting means and standard deviations were excluded (Nielsen 1996a, Nielsen 1996b, Marczyński 2005).

Figure 4 - Funnel plot of the standard error of the standardized mean difference (SMD) vs the SMD of all the studies on oxidative DNA damage shown in Table 5-

Supplemental Material (in a fixed effects model to get the pseudo CI lines).

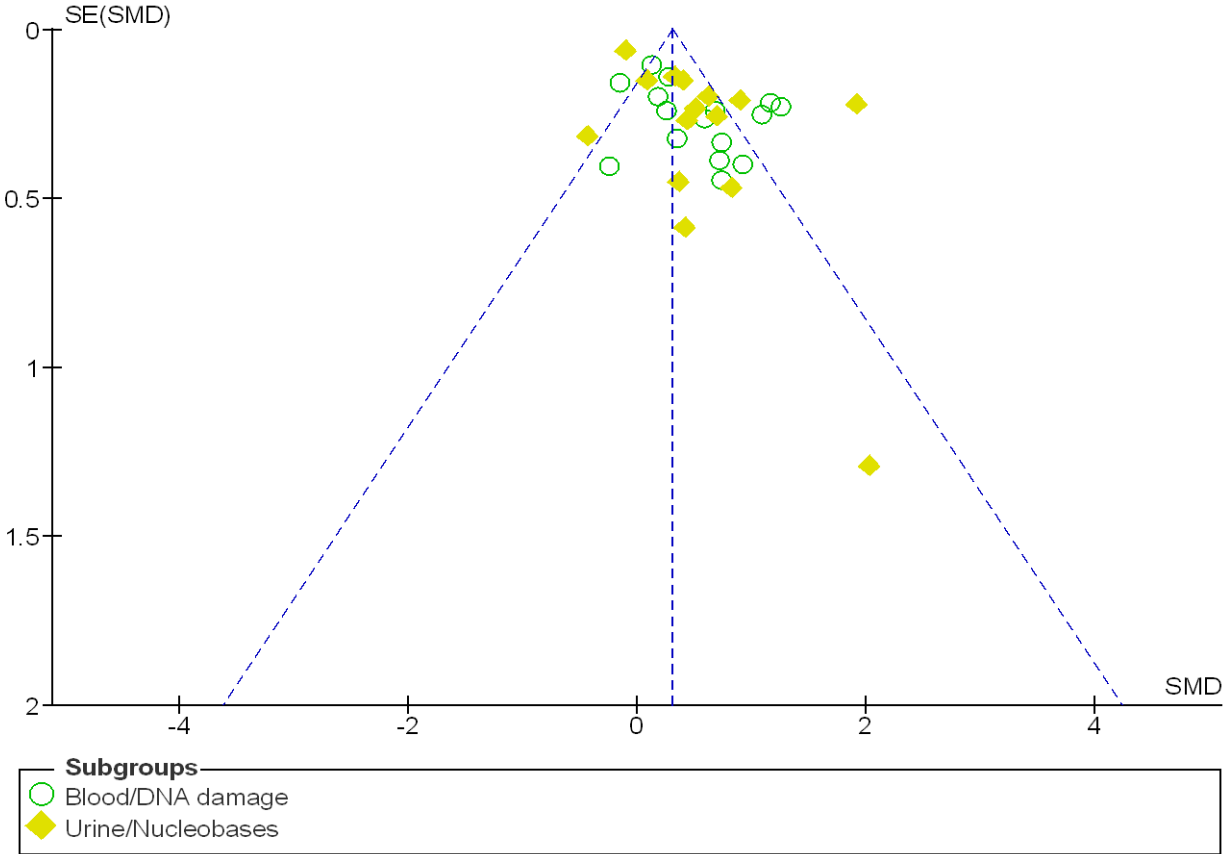

In the papers without report of SD this was estimated from the data as explained in the review and meta-analysis paper of Møller and Loft P 2010 (70).



## Supplemental Material References

- Abbey DE NN. Long- term inhalable particles and other air pollutants related to mortality in nonsmokers. *Am J Resp Crit Care Med* 1999;;373–82.
- Allen J, Trenga CA, Peretz A, *et al.* Effect of diesel exhaust inhalation on antioxidant and oxidative stress responses in adults with metabolic syndrome. *Inhal Toxicol* 2009;**21**:1061–7.
- Autrup H, Daneshvar B, Dragsted LO, *et al.* Biomarkers for exposure to ambient air pollution-comparison of carcinogen-DNA adduct levels with other exposure markers and markers for oxidative stress. *Environ Health Perspect* 1999;**107**:233–8.
- Avogbe PH, Ayi-Fanou L, Autrup H, *et al.* Ultrafine particulate matter and high-level benzene urban air pollution in relation to oxidative DNA damage. *Carcinogenesis* 2005;**26**:613–20.
- Ayi-Fanou L, Avogbe PH, Fayomi B, *et al.* DNA-adducts in subjects exposed to urban air pollution by benzene and polycyclic aromatic hydrocarbons (PAHs) in Cotonou, Benin. *Environ Toxicol* 2011;**26**:93–102.
- Baccarelli A, Wright RO, Bollati V, *et al.* Rapid DNA Methylation Changes after Exposure to Traffic Particles. *AmJRespirCritCare Med* 2009;**179**:572–8.
- Baccarelli A, Zanobetti A, Martinelli I, *et al.* Air pollution, smoking, and plasma homocysteine. *EnvironHealth Perspect* 2007;**115**:176–81.
- Bagryantseva Y, Novotna B, Rossner P Jr, *et al.* Oxidative damage to biological macromolecules in Prague bus drivers and garagemen: impact of air pollution and genetic polymorphisms. *Toxicol Lett* 2010;**199**:60–8.
- Balachandar V, Kumar BL, Suresh K, *et al.* Evaluation of chromosome aberrations in subjects exposed to environmental tobacco smoke in Tamilnadu, India. *BullEnvironContamToxicol* 2008;**81**:270–6.
- Beelen R, Hoek G, van den Brandt PA, *et al.* Long-term exposure to traffic-related air pollution and lung cancer risk. *Epidemiology* 2008;**19**:702–10.
- Beeson WL, Abbey DE, Knutsen SF. Long-term concentrations of ambient air pollutants and incident lung cancer in California adults: results from the AHSMOG study.Adventist Health Study on Smog. *EnvironHealth Perspect* 1998;**106**:813–22.
- Binkova B, Lewtas J, Miskova I, *et al.* DNA adducts and personal air monitoring of carcinogenic polycyclic aromatic hydrocarbons in an environmentally exposed population. *Carcinogenesis* 1995;**16**:1037–46.
- Bräuner EV, Forchhammer L, Møller P, *et al.* Exposure to ultrafine particles from ambient air and oxidative stress-induced DNA damage. *Environ Health Perspect* 2007;**115**:1177–82.
- Brunekreef B, Beelen R, Hoek G, *et al.* Effects of long-term exposure to traffic-related air pollution on respiratory and cardiovascular mortality in the Netherlands: the NLCS-AIR study. *ResRepHealth EffInst* 2009;**(139)**:5–71; discussion 73–89.
- Buell P, Dunn JE, Breslow L. Cancer of the lung and Los-Angeles-type air pollution. Prospective study. *Cancer* 1967;**20**:2139–47.
- Burgaz S, Cakmak Demircigil G, Karahalil B, *et al.* Chromosomal damage in peripheral blood lymphocytes of traffic policemen and taxi drivers exposed to urban air pollution. *Chemosphere* 2002;**47**:57–64.
- Buthbumrung N, Mahidol C, Navasumrit P, *et al.* Oxidative DNA damage and influence of genetic polymorphisms among urban and rural schoolchildren exposed to benzene. *Chem Biol Interact* 2008;**172**:185–94.
- Calderón-Garcidueñas L, Wen-Wang L, Zhang YJ, *et al.* 8-hydroxy-2'-deoxyguanosine, a major mutagenic oxidative DNA lesion, and DNA strand breaks in nasal respiratory epithelium of children exposed to urban pollution. *Environ Health Perspect* 1999;**107**:469–74.
- Castaño-Vinyals G, D'Errico A, Malats N, *et al.* Biomarkers of exposure to polycyclic aromatic hydrocarbons from environmental air pollution. *Occupational and Environmental Medicine* 2004;**61**:e12.
- Cavallo D, Ursini CL, Carelli G, *et al.* Occupational exposure in airport personnel: characterization and evaluation of genotoxic and oxidative effects. *Toxicology* 2006;**223**:26–35.
- Chuang C. Oxidative DNA damage estimated by urinary 8-hydroxydeoxyguanosine: influence of taxi driving, smoking and areca chewing. *Chemosphere* 2003;**52**:1163–71.
- Chuang K-J, Chan C-C, Su T-C, *et al.* The Effect of Urban Air Pollution on Inflammation, Oxidative Stress, Coagulation, and Autonomic Dysfunction in Young Adults. *Am J Respir Crit Care Med* 2007;**176**:370–6.
- Danielsen PH, Bräuner EV, Barregard L, *et al.* Oxidatively damaged DNA and its repair after experimental exposure to wood smoke in healthy humans. *Mutat Res* 2008;**642**:37–42.
- De Coster S, Koppen G, Bracke M, *et al.* Pollutant effects on genotoxic parameters and tumor-associated protein levels in adults: a cross sectional study. *Environ Health* 2008;**7**:26–26.
- Dockery DW, Pope CA, Xu X, *et al.* An Association between Air Pollution and Mortality in Six U.S. Cities. *NEnglJMed* 1993;**329**:1753–9.
- Fan R, Wang D, Mao C, *et al.* Preliminary study of children's exposure to PAHs and its association with 8-hydroxy-2'-deoxyguanosine in Guangzhou, China. *Environ Int* Published Online First: 19 April 2011. doi:10.1016/j.envint.2011.03.021
- Ayi Fanou L, Mobio TA, Creppy EE, *et al.* Survey of air pollution in Cotonou, Benin--air monitoring and biomarkers. *Sci Total Environ* 2006;**358**:85–96.
- Filleul L, Rondeau V, Vandentorren S, *et al.* Twenty five year mortality and air pollution: results from the French PAARC survey. *OccupEnvironMed* 2005;**62**:453–60.

- Freire C, Abril A, Fernández MF, *et al.* Urinary 1-hydroxypyrene and PAH exposure in 4-year-old Spanish children. *SciTotal Environ* 2009;**407**:1562–9.
- García-Suástegui WA, Huerta-Chagoya A, Carrasco-Colín KL, *et al.* Seasonal variations in the levels of PAH-DNA adducts in young adults living in Mexico City. *Mutagenesis* 2011;**26**:385–91.
- Hales S, Blakely T, Woodward A. Air pollution and mortality in New Zealand: cohort study. *Journal of Epidemiology and Community Health* Published Online First: 21 October 2010. doi:10.1136/jech.2010.112490
- Han Y-Y, Donovan M, Sung F-C. Increased urinary 8-hydroxy-2'-deoxyguanosine excretion in long-distance bus drivers in Taiwan. *Chemosphere* 2010;**79**:942–8.
- Hansen ÅM, Wallin H, Binderup ML, *et al.* Urinary 1-hydroxypyrene and mutagenicity in bus drivers and mail carriers exposed to urban air pollution in Denmark. *Mutation Research/Genetic Toxicology and Environmental Mutagenesis* 2004;**557**:7–17.
- Hansen ÅM, Raaschou-Nielsen O, Knudsen LE. Urinary 1-hydroxypyrene in children living in city and rural residences in Denmark. *SciTotal Environ* 2005;**347**:98–105.
- Harri M, Svoboda P, Mori T, *et al.* Analysis of 8-hydroxydeoxyguanosine among workers exposed to diesel particulate exhaust: comparison with urinary metabolites and PAH air monitoring. *Free Radic Res* 2005;**39**:963–72.
- Hemminki K, Zhang LF, Krüger J, *et al.* Exposure of bus and taxi drivers to urban air pollutants as measured by DNA and protein adducts. *Toxicol Lett* 1994;**72**:171–4.
- Herbstman JB, Tang D, Zhu D, *et al.* Prenatal Exposure to Polycyclic Aromatic Hydrocarbons, Benzo[a]Pyrene-DNA Adducts and Genomic DNA Methylation in Cord Blood. *Environmental Health Perspectives* Published Online First: 17 January 2012. doi:10.1289/ehp.1104056
- Hu S-W, Chan Y-J, Hsu H-T, *et al.* Urinary levels of 1-hydroxypyrene in children residing near a coal-fired power plant. *Environ Res* 2011;**111**:1185–91.
- Ishikawa H, Tian Y, Piao F, *et al.* Genotoxic damage in female residents exposed to environmental air pollution in Shenyang city, China. *Cancer Lett* 2006;**240**:29–35.
- Jerrett M, Burnett RT, Ma R, *et al.* Spatial analysis of air pollution and mortality in Los Angeles. *Epidemiology* 2005;**16**:727–36.
- Katanoda K, Sobue T, Satoh H, *et al.* An Association Between Long-Term Exposure to Ambient Air Pollution and Mortality From Lung Cancer and Respiratory Diseases in Japan. *Journal of Epidemiology* 2011;**21**:132–43.
- Kim JY, Prouty LA, Fang SC, *et al.* Association between fine particulate matter and oxidative DNA damage may be modified in individuals with hypertension. *J Occup Environ Med* 2009;**51**:1158–66.
- Knudsen LE, Norppa H, Gamborg MO, *et al.* Chromosomal Aberrations in Humans Induced by Urban Air Pollution: Influence of DNA Repair and Polymorphisms of GlutathioneS-Transferase M1 and N-Acetyltransferase 2. *Cancer Epidemiology Biomarkers & Prevention* 1999;**8**:303–10.
- Krewski D, Burnett RT, Goldberg M, *et al.* Reanalysis of the Harvard Six Cities Study, Part I: Validation and Replication. *InhalToxicol* 2005;**17**:335–42.
- Kyrtpoulos SA, Georgiadis P, Autrup H, *et al.* Biomarkers of genotoxicity of urban air pollution: Overview and descriptive data from a molecular epidemiology study on populations exposed to moderate-to-low levels of polycyclic aromatic hydrocarbons: the AULIS project. *Mutation Research/Genetic Toxicology and Environmental Mutagenesis* 2001;**496**:207–28.
- Laden F, Schwartz J, Speizer FE, *et al.* Reduction in Fine Particulate Air Pollution and Mortality: Extended Follow-up of the Harvard Six Cities Study. *AmJRespirCritCare Med* 2006;**173**:667–72.
- Lagorio S, Tagesson C, Forastiere F, *et al.* Exposure to benzene and urinary concentrations of 8-hydroxydeoxyguanosine, a biological marker of oxidative damage to DNA. *Occup Environ Med* 1994;**51**:739–43.
- Lai C, Liou S, Lin H, *et al.* Exposure to traffic exhausts and oxidative DNA damage. *Occup Environ Med* 2005;**62**:216–22.
- Lee M-W, Chen M-L, Lung S-CC, *et al.* Exposure assessment of PM2.5 and urinary 8-OHdG for diesel exhaust emission inspector. *Sci Total Environ* 2010;**408**:505–10.
- Loft S, Poulsen HE, Vistisen K, *et al.* Increased urinary excretion of 8-oxo-2'-deoxyguanosine, a biomarker of oxidative DNA damage, in urban bus drivers. *Mutat Res* 1999;**441**:11–9.
- Madrigano J, Baccarelli A, Mittleman MA, *et al.* Prolonged exposure to particulate pollution, genes associated with glutathione pathways, and DNA methylation in a cohort of older men. *Environ Health Perspect* 2011;**119**:977–82.
- Marczynski B, Preuss R, Mensing T, *et al.* Genotoxic risk assessment in white blood cells of occupationally exposed workers before and after alteration of the polycyclic aromatic hydrocarbon (PAH) profile in the production material: comparison with PAH air and urinary metabolite levels. *Int Arch Occup Environ Health* 2005;**78**:97–108.
- Martínez-Salinas RI, Elena Leal M, Batres-Esquivel LE, *et al.* Exposure of children to polycyclic aromatic hydrocarbons in Mexico: assessment of multiple sources. *Int Arch Occup Environ Health* 2010;**83**:617–23.
- McDonnell WF, Nishino-Ishikawa N, Petersen FF, *et al.* Relationships of mortality with the fine and coarse fractions of long-term ambient PM10 concentrations in nonsmokers. *JExpoAnalEnvironEpidemiol* 2000;**10**:427–36.
- Merlo F, Andreassen A, Weston A, *et al.* Urinary excretion of 1-hydroxypyrene as a marker for exposure to urban air levels of polycyclic aromatic hydrocarbons. *Cancer Epidemiology Biomarkers & Prevention* 1998;**7**:147–55.
- Mills PK, Abbey D, Beeson WL, *et al.* Ambient air pollution and cancer in California Seventh-day Adventists. *ArchEnvironHealth* 1991;**46**:271–80.
- Møller P, Loft S. Oxidative Damage to DNA and Lipids as Biomarkers of Exposure to Air Pollution. *Environ Health Perspect* 2010;**118**:1126–36.

- Mori T, Yoshinaga J, Suzuki K, *et al.* Exposure to polycyclic aromatic hydrocarbons, arsenic and environmental tobacco smoke, nutrient intake, and oxidative stress in Japanese preschool children. *Sci Total Environ* 2011;**409**:2881–7.
- Nafstad P, Haheim LL, Oftedal B, *et al.* Lung cancer and air pollution: a 27 year follow up of 16 209 Norwegian men. *Thorax* 2003;**58**:1071–6.
- Neri M, Ugolini D, Bonassi S, *et al.* Children’s exposure to environmental pollutants and biomarkers of genetic damage. II. Results of a comprehensive literature search and meta-analysis. *MutatRes* 2006;**612**:14–39.
- Nielsen PS, Okkels H, Sigsgaard T, *et al.* Exposure to urban and rural air pollution: DNA and protein adducts and effect of glutathione-S-transferase genotype on adduct levels. *IntArchOccupEnvironHealth* 1996;**68**:170–6.
- Nielsen PS, de Pater N, Okkels H, *et al.* Environmental air pollution and DNA adducts in Copenhagen bus drivers--Effect of GSTM1 and NAT2 genotypes on adduct levels. *Carcinogenesis* 1996;**17**:1021–7.
- Novotna B, Topinka J, Solansky I, *et al.* Impact of air pollution and genotype variability on DNA damage in Prague policemen. *Toxicol Lett* 2007;**172**:37–47.
- Palli D, Saieva C, Munnia A, *et al.* DNA adducts and PM10 exposure in traffic-exposed workers and urban residents from the EPIC-Florence City study. *SciTotal Environ* 2008;**403**:105–12.
- Palli D, Sera F, Giovannelli L, *et al.* Environmental ozone exposure and oxidative DNA damage in adult residents of Florence, Italy. *Environ Pollut* 2009;**157**:1521–5.
- Pavanello S, Bollati V, Pesatori AC, *et al.* Global and gene-specific promoter methylation changes are related to anti-B[a]PDE-DNA adduct levels and influence micronuclei levels in polycyclic aromatic hydrocarbon-exposed individuals. *IntJCancer* 2009;**125**:1692–7.
- Pavanello S, Pulliero A, Saia BO, *et al.* Determinants of anti-benzo[a]pyrene diol epoxide–DNA adduct formation in lymphomonocytes of the general population. *Mutation Research/Genetic Toxicology and Environmental Mutagenesis* 2006;**611**:54–63.
- Pedersen M, Wichmann J, Autrup H, *et al.* Increased micronuclei and bulky DNA adducts in cord blood after maternal exposures to traffic-related air pollution. *EnvironRes* 2009;**109**:1012–20.
- Peluso M, Munnia A, Palli D, *et al.* Bulky DNA adducts and lung cancer risk: a prospective study in EPIC investigation. *AACR Meeting Abstracts* 2005;**2005**:512–a.
- Peluso M, Srivatanakul P, Munnia A, *et al.* DNA adduct formation among workers in a Thai industrial estate and nearby residents. *SciTotal Environ* 2008;**389**:283–8.
- Perera F, Brenner D, Jeffrey A, *et al.* DNA adducts and Related Biomarkers in Populations Exposed to Environmental Carcinogens. 1991.
- Pope C, Thun M, Namboodiri M, *et al.* Particulate air pollution as a predictor of mortality in a prospective study of U.S. adults. *AmJRespirCritCare Med* 1995;**151**:669–74.
- Pope III CA, Burnett RT, Thun MJ, *et al.* Lung Cancer, Cardiopulmonary Mortality, and Long-term Exposure to Fine Particulate Air Pollution. *JAMA* 2002;**287**:1132–41.
- Pope CA, Burnett RT, Turner MC, *et al.* Lung Cancer and Cardiovascular Disease Mortality Associated with Ambient Air Pollution and Cigarette Smoke: Shape of the Exposure–Response Relationships. *Environmental Health Perspectives* 2011;**119**:1616–21.
- Raaschou-Nielsen O, Bak H, Sørensen M, *et al.* Air Pollution from Traffic and Risk for Lung Cancer in Three Danish Cohorts. *Cancer Epidemiology Biomarkers & Prevention* 2010;**19**:1284–91.
- Raaschou-Nielsen O, Andersen ZJ, Hvidberg M, *et al.* Lung Cancer Incidence and Long-Term Exposure to Air Pollution from Traffic. *Environmental Health Perspectives* 2011;**119**:860–5.
- Ren C, Fang S, Wright RO, *et al.* Urinary 8-hydroxy-2'-deoxyguanosine as a biomarker of oxidative DNA damage induced by ambient pollution in the Normative Aging Study. *Occup Environ Med* 2011;**68**:562–9.
- Rossner Jr. P, Uhlírova K, Beskid O, *et al.* Expression of XRCC5 in peripheral blood lymphocytes is upregulated in subjects from a heavily polluted region in the Czech Republic. *Mutation Research/Fundamental and Molecular Mechanisms of Mutagenesis* 2011;**713**:76–82.
- Rossner P Jr, Svecova V, Milcova A, *et al.* Oxidative and nitrosative stress markers in bus drivers. *Mutat Res* 2007;**617**:23–32.
- Rossner P Jr, Rossnerova A, Sram RJ. Oxidative stress and chromosomal aberrations in an environmentally exposed population. *Mutat Res* 2011;**707**:34–41.
- Rossnerova A, Spatova M, Pastorkova A, *et al.* Micronuclei levels in mothers and their newborns from regions with different types of air pollution. *Mutat Res* 2011;**715**:72–8.
- Ruchirawa M, Mahidol C, Tangjarukij C, *et al.* Exposure to genotoxins present in ambient air in Bangkok, Thailand--particle associated polycyclic aromatic hydrocarbons and biomarkers. *SciTotal Environ* 2002;**287**:121–32.
- Singh R, Kaur B, Kalina I, *et al.* Effects of environmental air pollution on endogenous oxidative DNA damage in humans. *Mutat Res* 2007;**620**:71–82.
- Sørensen M, Autrup H, Hertel O, *et al.* Personal exposure to PM2.5 and biomarkers of DNA damage. *Cancer Epidemiol Biomarkers Prev* 2003;**12**:191–6.
- Sørensen M, Skov H, Autrup H, *et al.* Urban benzene exposure and oxidative DNA damage: influence of genetic polymorphisms in metabolism genes. *The Science of The Total Environment* 2003;**309**:69–80.
- Sram RJ., Beskid O, Rössnerova A, *et al.* Environmental exposure to carcinogenic polycyclic aromatic hydrocarbons : The interpretation of cytogenetic analysis by FISH. *Toxicology letters* 2007;**172**:12–20.
- Srám RJ, Binková B, Rössner P, *et al.* Adverse reproductive outcomes from exposure to environmental mutagens. *Mutat Res* 1999;**428**:203–15.
- Staessen JA, Nawrot T, Hond ED, *et al.* Renal function, cytogenetic measurements, and sexual development in adolescents in relation to environmental pollutants: a feasibility study of biomarkers. *The Lancet* 2001;**357**:1660–9.

- Suzuki J, Inoue Y, Suzuki S. Changes in the urinary excretion level of 8-hydroxyguanine by exposure to reactive oxygen-generating substances. *Free Radic Biol Med* 1995;**18**:431–6.
- Svecova V, Rossner Jr. P, Dostal M, *et al.* Urinary 8-oxodeoxyguanosine levels in children exposed to air pollutants. *Mutation Research/Fundamental and Molecular Mechanisms of Mutagenesis* 2009;**662**:37–43.
- Svecova V, Milcova A, Lnenickova Z, *et al.* Seasonal variability of oxidative stress markers in city bus drivers. Part I. Oxidative damage to DNA. *Mutation Research* 2008;**642**:14–20.
- Tarantini L, Bonzini M, Apostoli P, *et al.* Effects of particulate matter on genomic DNA methylation content and iNOS promoter methylation. *EnvironHealth Perspect* 2009;**117**:217–22.
- Topinka J, Sevastyanova O, Binkova B, *et al.* Biomarkers of air pollution exposure—A study of policemen in Prague. *Mutation Research/Fundamental and Molecular Mechanisms of Mutagenesis* 2007;**624**:9–17.
- Topinka J., Binkova B., Mrackova G., *et al.* DNA adducts in human placenta as related to air pollution and to GSTM1 genotype. *Mutation research Genetic toxicology and environmental mutagenesis* 1997;**390**:59–68.
- Tuntawiroon J, Mahidol C, Navasumrit P, *et al.* Increased health risk in Bangkok children exposed to polycyclic aromatic hydrocarbons from traffic-related sources. *Carcinogenesis* 2007;**28**:816–22.
- Turner MC, Krewski D, Pope CA, *et al.* Long-term Ambient Fine Particulate Matter Air Pollution and Lung Cancer in a Large Cohort of Never-Smokers. *American Journal of Respiratory and Critical Care Medicine* 2011;**184**:1374–1381.
- Vineis P, Hoek G, Krzyzanowski M, *et al.* Air pollution and risk of lung cancer in a prospective study in Europe. *IntJCancer* 2006;**119**:169–74.
- Vinzents PS, Møller P, Sørensen M, *et al.* Personal exposure to ultrafine particles and oxidative DNA damage. *Environ Health Perspect* 2005;**113**:1485–90.
- Whyatt RM, Santella RM, Jedrychowski W, *et al.* Relationship between ambient air pollution and DNA damage in Polish mothers and newborns. *EnvironHealth Perspect* 1998;**106 Suppl 3**:821–6.
- Yang K, Airoidi L, Pastorelli R, *et al.* Aromatic DNA adducts in lymphocytes of humans working at high and low traffic density areas. *Chemico-Biological Interactions* 1996;**101**:127–36.
- Yorifuji T, Kashima S, Tsuda T, *et al.* Long-term exposure to traffic-related air pollution and mortality in Shizuoka, Japan. *OccupEnvironMed* 2010;**67**:111–7.
- Zidzik J, Kalina I, Salagovic J, *et al.* Influence of PAHs in ambient air on chromosomal aberrations in exposed subjects : International study - EXPAH. *Mutation Research* 2007;**620**:41–8.
